# Supplementary material for: Transition metal-free stereospecific access to (E)-(1-fluoro-2-arylvinyl)phosphine borane complexes
Source: Royal Society of Chemistry journal article supplement (doi:10.1039/c6cc09673e), 2017-01-01
Supplement: c6cc09673e1.pdf [file c6cc09673e1.pdf]

## Transition Metal-Free Stereospecific Access to (*E*)-(1-fluoro-2-arylvinyl)phosphine Borane Complexes

Kevin Rousée,<sup>a</sup> Xavier Pannecoucke,<sup>a</sup> Annie-Claude Gaumont,<sup>b</sup> Jean-François Lohier,<sup>b</sup>  
Fabrice Morlet-Savary,<sup>c</sup> Jacques Lalevée,<sup>c</sup> Jean-Philippe Bouillon,<sup>a</sup> Samuel Couve-  
Bonnaire,\*<sup>a</sup> and Sami Lakhdar\*<sup>b</sup>

<sup>a</sup> Normandie Univ., INSA Rouen, UNIROUEN, CNRS, COBRA, 76000 Rouen, France.

<sup>b</sup> Normandie Univ., ENSICAEN, Unicaen, CNRS, LCMT, 14000 Caen, France.

<sup>c</sup> Institut de Science des Matériaux de Mulhouse IS2M – UMR CNRS 7361 – UHA, 15, rue Jean Starcky, 68057  
Mulhouse Cedex, France.

E-mails: samuel.couve-bonnaire@insa-rouen.fr, sami.lakhdar@ensicaen.fr

### Supporting information

#### Table of content:

|                                                              |     |
|--------------------------------------------------------------|-----|
| 1. General information.....                                  | S1  |
| 2. General procedure for the coupling reaction.....          | S1  |
| 3. Optimization of the reaction and control experiments..... | S2  |
| 4. Experimental data for compounds <b>3a-3m</b> .....        | S4  |
| 5. NMR spectra for compounds <b>3a-3m</b> .....              | S13 |
| 6. Electron paramagnetic resonance (EPR) experiment.....     | S41 |
| 7. X-Ray structures.....                                     | S42 |

## 1. General information

Commercially available reagents were used without further purification. Anhydrous solvents were purchased from Sigma-Aldrich. Chromatography was carried out using neutral alumina 90 (70-230 mesh); the following solvents were used: DCM = dichloromethane, MeCN = acetonitrile. Melting points (mp) were determined on a Fisher Scientific hot stage melting point apparatus and are uncorrected.  $^1\text{H}$ ,  $^{11}\text{B}$ ,  $^{13}\text{C}$ ,  $^{19}\text{F}$  and  $^{31}\text{P}$  NMR spectra were recorded using a Bruker AC 400 spectrometer operating at 400 MHz ( $^1\text{H}$ ), 160 MHz ( $^{11}\text{B}$ ), 100 MHz ( $^{13}\text{C}$ ), 376 MHz ( $^{19}\text{F}$ ), 162 MHz ( $^{31}\text{P}$ ), or a Bruker AC 300 spectrometer operating at 300 MHz ( $^1\text{H}$ ), 120 MHz ( $^{11}\text{B}$ ), 75 MHz ( $^{13}\text{C}$ ), 282 MHz ( $^{19}\text{F}$ ), 122 MHz ( $^{31}\text{P}$ ), respectively. The chemical shifts ( $\delta$ ) were calibrated on residual proton and carbon resonances of  $\text{CDCl}_3$  ( $^1\text{H}$ , 7.26 ppm and  $^{13}\text{C}$ , 77.2 ppm), on boron resonance of  $\text{BF}_3\text{-Et}_2\text{O}$  ( $^{11}\text{B}$ , 0.0 ppm), on fluorine resonance of  $\text{CFCl}_3$  ( $^{19}\text{F}$ , 0.0 ppm) and on phosphorus resonance of  $\text{PPh}_3$  ( $^{31}\text{P}$ , 0.0 ppm). In the  $^{13}\text{C}$  NMR spectra, signals corresponding to CH,  $\text{CH}_2$ , or  $\text{CH}_3$  groups were assigned from DEPT-135. The multiplicity signals were indicated with the following abbreviations: s (singlet), d (doublet), t (triplet), q (quartet), m (multiplet), and b (broad) and the combinations thereof. Proton decoupled  $^{13}\text{C}$  NMR spectra were indicated with the  $\{^1\text{H}\}$  label. IR spectra were recorded on Perkin Elmer Spectrum 100 FT IR spectrometer. High Resolution Mass Spectra (HRMS) were recorded on a JEOL AccuTof 4G spectrometer coupled to a GC HP Agilent 7890 in ElectroSpray Ionisation mode (ESI) or Field Desorption (FD). EPR-ST experiments were carried out using an X-Band spectrometer (MS 400 Magnettech). The ESR spectra simulations were carried out using the WINSIM software. *Gem*-Bromofluoroalkenes were prepared according to our previous report (X. Lei, G. Dutheuil, X. Pannecoucke, J.-C. Quirion *Org. Lett.* **2004**, *6*, 2101).

## 2. General procedure for the coupling reaction

### A. General coupling reaction

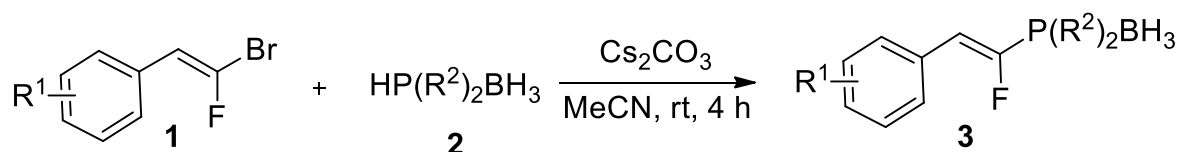

In a dry vial under argon atmosphere was added *gem*-bromofluoroalkene **1** (1 equiv), phosphine borane **2** (1.1 equiv), and Cs<sub>2</sub>CO<sub>3</sub> (1.2 equiv). The vial was then filled with dry and degassed

MeCN (5 mL/mmol), then was stirred for 4 h at room temperature. The crude was then chromatographed on neutral alumina to afford the pure product **3**.

### B. One pot coupling/deboration sequence

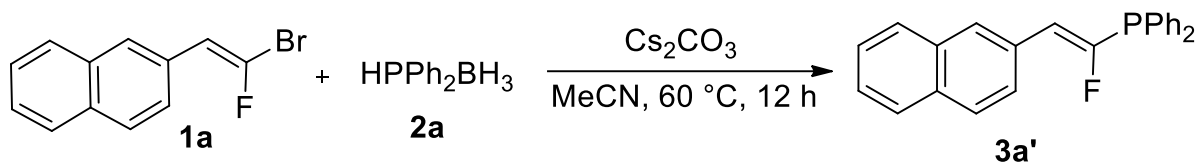

In a dry vial under argon atmosphere was added *gem*-bromofluoroalkene **1a** (0.20 mmol, 50 mg, 1 equiv), phosphine borane **2a** (0.22 mmol, 44 mg, 1.1 equiv), and Cs<sub>2</sub>CO<sub>3</sub> (0.24 mmol, 78 mg, 1.2 equiv). The vial was then filled with dry and degassed MeCN (1 mL, 5 mL/mmol), then was stirred for 12 h at 60 °C. The crude was then chromatographed on silica gel to afford the pure product **3a'** (30 mg, 43%).

## 3. Optimization of the reaction and control experiments

### A. Variation of the phosphine

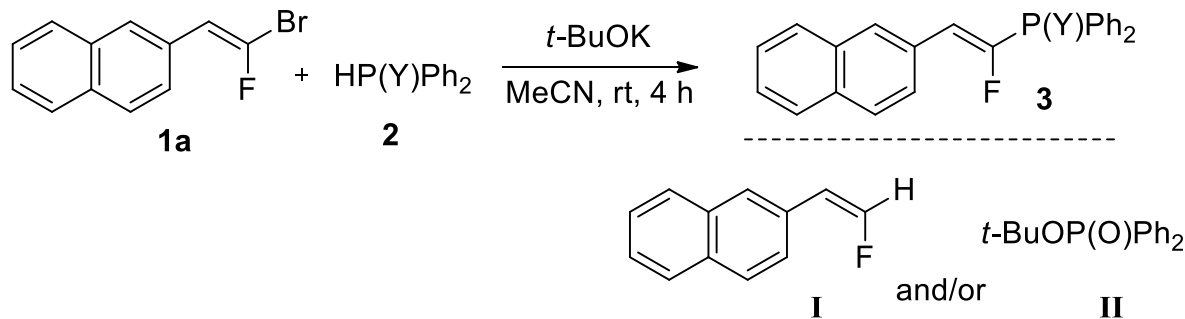

| Entry | Y               | Yield <sup>a</sup> | Notes                           |
|-------|-----------------|--------------------|---------------------------------|
| 1     | BH <sub>3</sub> | 21% ( <b>3a</b> )  | -                               |
| 2     | O               | 0%                 | Products <b>I</b> and <b>II</b> |
| 3     | -               | 0%                 | Product <b>I</b>                |

<sup>a</sup> Isolated yields.

## B. Optimization of the purification conditions for the phosphine borane

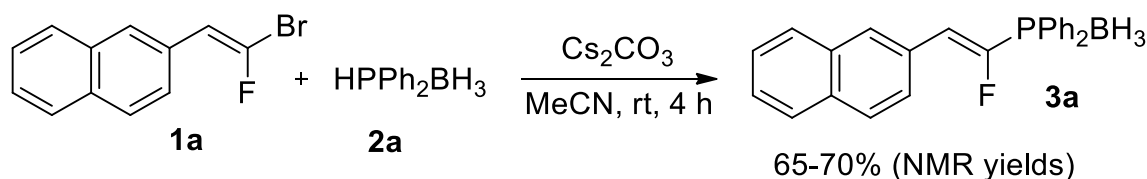

| Entry | Purification method                       | Yield <sup>a</sup> | Notes                                                            |
|-------|-------------------------------------------|--------------------|------------------------------------------------------------------|
| 1     | Filtration <sup>b</sup>                   | n.d.               | No separation of <b>3a</b> and HPPH <sub>2</sub> BH <sub>3</sub> |
| 2     | Silica gel pad <sup>b</sup>               | n.d.               | -                                                                |
| 3     | Silica gel column <sup>b</sup>            | 25%                | -                                                                |
| 4     | Dehydrated silica gel column <sup>b</sup> | 14%                | -                                                                |
| 5     | Basic alumina column <sup>b</sup>         | 32%                | -                                                                |
| 6     | Basic alumina pad <sup>b</sup>            | 45%                | -                                                                |
| 7     | Neutral alumina pad <sup>b</sup>          | 49%                | Few by-products                                                  |
| 8     | Neutral alumina column <sup>c</sup>       | 63%                | -                                                                |
| 9     | Neutral alumina column <sup>c</sup>       | n.d.               | Degradation                                                      |

<sup>a</sup> Isolated yields. <sup>b</sup> With CH<sub>2</sub>Cl<sub>2</sub> stabilized with amylene. <sup>c</sup> With CH<sub>2</sub>Cl<sub>2</sub> stabilized with ethanol. n.d.: not determined.

## C. Reaction with (*Z*) *gem*-bromofluoroalkènes

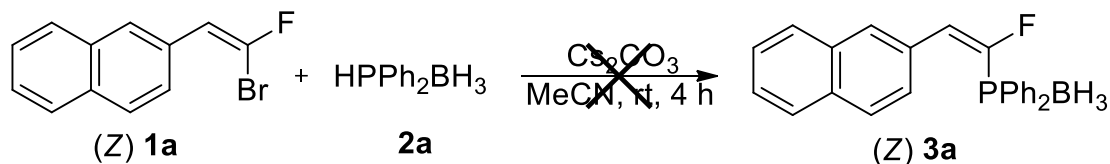

In a dry vial under argon atmosphere was added *gem*-bromofluoroalkene (*Z*) **1a** (1 equiv), phosphine borane **2** (1.1 equiv), and Cs<sub>2</sub>CO<sub>3</sub> (1.2 equiv). The vial was then filled with dry and degassed MeCN (5 mL/mmol), then was stirred for 4 h at room temperature. Degradation of starting material (*Z*) **1a** was observed by <sup>19</sup>F NMR, probably because of the basic conditions, according to previous report: X. Lei, G. Dutheuil, X. Pannecoucke, J.-C. Quirion *Org. Lett.* **2004**, *6*, 2101.

#### 4. Experimental data for compounds 3a-3m

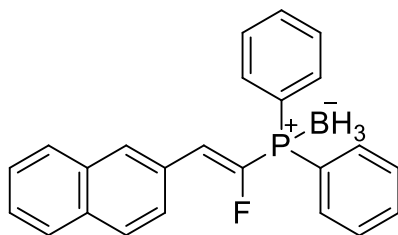

**(E)-((1-Fluoro-2-(naphth-2-yl)vinyl)diphenylphosphonio)trihydroborate 3a:** (*E*)-2-(2-bromo-2-fluorovinyl)naphthalene (0.2 mmol, 50 mg), diphenylphosphine borane (0.22 mmol, 44 mg), Cs<sub>2</sub>CO<sub>3</sub> (0.24 mmol, 78 mg) in MeCN (1 mL) were reacted according to the general procedure. The crude product was chromatographed on neutral alumina eluting with pure pentane to pentane/DCM 8/2 to afford the desired compound in 63% yield (46 mg) as a colourless solid. mp 173-175 °C. IR: 3058, 2923, 2849, 2392, 2348, 1435, 1054, 910, 821 cm<sup>-1</sup>. <sup>1</sup>H NMR (400 MHz, CDCl<sub>3</sub>): δ 8.11 (s, 1H), 7.86-7.74 (m, 6H), 7.66-7.40 (m, 10H), 7.04 (dd, <sup>3</sup>J<sub>H-F</sub> = 42.7, <sup>3</sup>J<sub>H-P</sub> = 8.9 Hz, 1H), 1.7-0.7 (bm, 3H). <sup>13</sup>C NMR {<sup>1</sup>H} (100 MHz, CDCl<sub>3</sub>): δ 153.1 (dd, <sup>1</sup>J<sub>C-F</sub> = 295.4, <sup>1</sup>J<sub>C-P</sub> = 62.9 Hz, Cq), 133.6 (d, *J* = 1.7 Hz, Cq), 133.3 (s, Cq), 133.2 (d, <sup>2</sup>J<sub>C-P</sub> = 10.0 Hz, 4xCH), 132.0 (d, <sup>4</sup>J<sub>C-P</sub> = 2.4 Hz, 2xCH), 130.4 (d, *J* = 7.7 Hz, CH), 129.3 (dd, <sup>3</sup>J = 10.9, 2.4 Hz, Cq), 129.1 (d, <sup>3</sup>J<sub>C-P</sub> = 10.6 Hz, 4xCH), 128.7 (s, CH), 128.5 (s, CH), 127.8 (s, CH), 127.3 (s, CH), 126.9 (d, *J* = 7.9 Hz, CH), 126.72 (d, <sup>1</sup>J<sub>C-P</sub> = 60.9 Hz, 2xCq), 126.68 (s, CH), 125.3 (d, <sup>2</sup>J = 26.6 Hz, CH). <sup>11</sup>B NMR (160 MHz, CDCl<sub>3</sub>): δ -38.3 (m). <sup>19</sup>F NMR (376 MHz, CDCl<sub>3</sub>): δ -114.6 (dd, <sup>3</sup>J<sub>F-H</sub> = 42.7, <sup>2</sup>J<sub>F-P</sub> = 17.5 Hz). <sup>31</sup>P NMR (162 MHz, CDCl<sub>3</sub>): δ 21.1 (m). HRMS (ESI-TOF): calcd for C<sub>24</sub>H<sub>21</sub>BFNaP *m/z* 393.1356 [M+Na]<sup>+</sup>, found 393.1345.

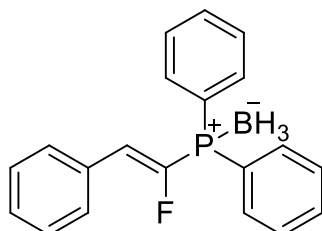

**(E)-((1-Fluoro-2-phenylvinyl)diphenylphosphonio)trihydroborate 3b:** (*E*)-2-(2-bromo-2-fluorovinyl)benzene (0.2 mmol, 40 mg), diphenylphosphine borane (0.22 mmol, 44 mg), Cs<sub>2</sub>CO<sub>3</sub> (0.24 mmol, 78 mg) in MeCN (1 mL) were reacted according to the general procedure. The crude product was chromatographed on neutral alumina eluting with pure pentane to pentane/DCM 7/3 to afford the desired compound in 40% yield (25 mg) as a colourless solid.

mp 113-115 °C. IR: 3054, 2387, 1485, 1435, 1052, 875, 829 cm<sup>-1</sup>. <sup>1</sup>H NMR (300 MHz, CDCl<sub>3</sub>): δ 7.77 (dd, *J* = 11.1, 7.6 Hz, 4H), 7.68-7.62 (m, 2H), 7.58-7.45 (m, 6H), 7.43- 7.34 (m, 3H), 6.89 (dd, <sup>3</sup>*J*<sub>H-F</sub> = 42.7, <sup>3</sup>*J*<sub>H-P</sub> = 8.9 Hz, 1H), 1.5-0.7 (bm, 3H). <sup>13</sup>C NMR {<sup>1</sup>H} (75 MHz, CDCl<sub>3</sub>): δ 152.9 (dd, <sup>1</sup>*J*<sub>C-F</sub> = 295.1, <sup>1</sup>*J*<sub>C-P</sub> = 62.9 Hz, Cq), 133.1 (d, <sup>2</sup>*J*<sub>C-P</sub> = 10.1 Hz, 4xCH), 131.9 (d, <sup>4</sup>*J*<sub>C-P</sub> = 2.5 Hz, 2xCH), 131.8 (dd, <sup>3</sup>*J* = 11.4, 1.7 Hz, Cq), 130.1 (d, *J* = 7.7 Hz, 2xCH), 129.6 (d, *J* = 2.4 Hz, CH), 129.1 (d, <sup>3</sup>*J*<sub>C-P</sub> = 10.6 Hz, 4xCH), 128.9 (s, 2xCH), 126.7 (d, <sup>1</sup>*J*<sub>C-P</sub> = 60.9 Hz, 2xCq), 125.2 (d, <sup>2</sup>*J* = 26.5 Hz, CH). <sup>11</sup>B NMR (120 MHz, CDCl<sub>3</sub>): δ -38.2 (m). <sup>19</sup>F NMR (282 MHz, CDCl<sub>3</sub>): δ -114.7 (dd, <sup>3</sup>*J*<sub>F-H</sub> = 42.7, <sup>2</sup>*J*<sub>F-P</sub> = 17.8 Hz). <sup>31</sup>P NMR (122 MHz, CDCl<sub>3</sub>): δ 21.1 (m). HRMS (FD-TOF): calcd for C<sub>20</sub>H<sub>16</sub>FP *m/z* 306.0973 [M-BH<sub>3</sub>]<sup>+</sup>, found 306.0974.

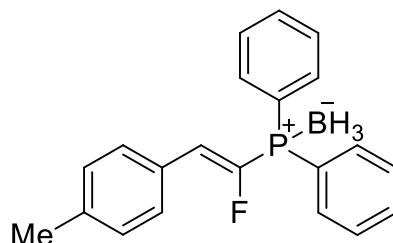

**(*E*)-((1-Fluoro-2-(*p*-tolyl)vinyl)diphenylphosphonio)trihydroborate 3c:** (*E*)-1-(2-bromo-2-fluorovinyl)-4-methylbenzene (0.20 mmol, 43 mg), diphenylphosphine borane (0.22 mmol, 44 mg), Cs<sub>2</sub>CO<sub>3</sub> (0.24 mmol, 78 mg) in MeCN (1 mL) were reacted according to the general procedure. The crude product was chromatographed on neutral alumina eluting with pure pentane to pentane/DCM 8/2 to afford the desired compound in 22% yield (15 mg) as a sticky colourless solid. IR: 2930, 2838, 2388, 1593, 1500, 1291, 1254, 1179, 1107, 1057, 1025, 825, 801 cm<sup>-1</sup>. <sup>1</sup>H NMR (300 MHz, CDCl<sub>3</sub>): δ 7.74 (dd, *J* = 11.1, 7.4 Hz, 4H), 7.61-7.33 (m, 8H), 7.18 (d, *J* = 8.0 Hz, 2H), 6.84 (dd, <sup>3</sup>*J*<sub>H-F</sub> = 42.9, <sup>3</sup>*J*<sub>H-P</sub> = 8.9 Hz, 1H), 2.36 (s, 3H), 1.4-1.1 (bm, 3H). Selected <sup>13</sup>C NMR {<sup>1</sup>H} (75 MHz, CDCl<sub>3</sub>): δ 139.8 (d, *J* = 2.5 Hz, Cq), 133.2 (d, *J* = 10.1 Hz, Cq), 133.0 (d, <sup>2</sup>*J*<sub>C-P</sub> = 10.0 Hz, 4xCH), 131.7 (d, <sup>4</sup>*J*<sub>C-P</sub> = 2.5 Hz, 2xCH), 130.0 (d, *J* = 7.6 Hz, 2xCH), 129.4 (s, 2xCH), 128.9 (d, <sup>3</sup>*J*<sub>C-P</sub> = 10.6 Hz, 4xCH), 126.7 (d, <sup>1</sup>*J*<sub>C-P</sub> = 61.0 Hz, 2xCq), 125.1 (d, <sup>2</sup>*J* = 26.7 Hz, CH), 21.5 (s, CH<sub>3</sub>). <sup>11</sup>B NMR (120 MHz, CDCl<sub>3</sub>): δ -37.8 (m). <sup>19</sup>F NMR (282 MHz, CDCl<sub>3</sub>): δ -116.1 (dd, <sup>3</sup>*J*<sub>F-H</sub> = 43.0, <sup>2</sup>*J*<sub>F-P</sub> = 17.5 Hz). <sup>31</sup>P NMR (122 MHz, CDCl<sub>3</sub>): δ 21.1 (m). HRMS (ESI-TOF): calcd for C<sub>21</sub>H<sub>19</sub>FP *m/z* 321.1208 [M-BH<sub>3</sub>+H]<sup>+</sup>, found 321.1212.

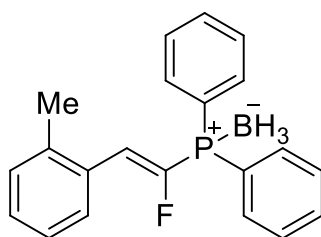

**(E)-((1-Fluoro-2-(o-tolyl)vinyl)diphenylphosphonio)trihydroborate 3d:** (*E*)-1-(2-bromo-2-fluorovinyl)-2-methylbenzene (0.20 mmol, 43 mg), diphenylphosphine borane (0.22 mmol, 44 mg), Cs<sub>2</sub>CO<sub>3</sub> (0.24 mmol, 78 mg) in MeCN (1 mL) were reacted according to the general procedure. The crude product was chromatographed on neutral alumina eluting with pure pentane to pentane/DCM 8/2 to afford the desired compound in 84% yield (56 mg) as a sticky colourless solid. IR: 3058, 2924, 2387, 2340, 1482, 1436, 1107, 1053, 830 cm<sup>-1</sup>. <sup>1</sup>H NMR (300 MHz, CDCl<sub>3</sub>): δ 7.84-7.75 (m, 5H), 7.64-7.56 (m, 2H), 7.55-7.48 (m, 4H), 7.31-7.25 (m, 3H), 7.17 (dd, <sup>3</sup>J<sub>H-F</sub> = 42.2, <sup>3</sup>J<sub>H-P</sub> = 9.3 Hz, 1H), 2.41 (s, 3H), 1.6-1.2 (bm, 3H). <sup>11</sup>B NMR (120 MHz, CDCl<sub>3</sub>): δ -38.5 (m). <sup>19</sup>F NMR (282 MHz, CDCl<sub>3</sub>): δ -116.4 (dd, <sup>3</sup>J<sub>F-H</sub> = 42.2, <sup>2</sup>J<sub>F-P</sub> = 18.5 Hz). <sup>31</sup>P NMR (122 MHz, CDCl<sub>3</sub>): δ 21.6 (m). HRMS (ESI-TOF): calcd for C<sub>21</sub>H<sub>19</sub>FP *m/z* 321.1208 [M-BH<sub>3</sub>+H]<sup>+</sup>, found 321.1209.

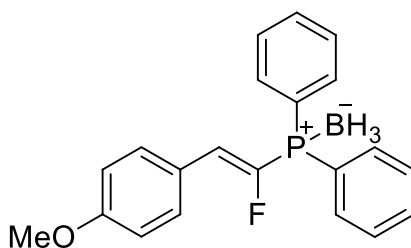

**(E)-((2-(4-Methoxyphenyl)-1-fluorovinyl)diphenylphosphonio)trihydroborate 3e:** (*E*)-1-(2-bromo-2-fluorovinyl)-4-methoxybenzene (0.2 mmol, 46 mg), diphenylphosphine borane (0.22 mmol, 44 mg), Cs<sub>2</sub>CO<sub>3</sub> (0.24 mmol, 78 mg) in MeCN (1 mL) were reacted according to the general procedure. The crude product was chromatographed on neutral alumina eluting with pentane/DCM 8/2 to afford the desired compound in 63% yield (46 mg) as a colourless solid. mp 85-87 °C. IR: 3056, 2933, 2837, 2386, 2355, 2342, 1605, 1509, 1436, 1251, 1178, 1055, 1028, 828 cm<sup>-1</sup>. <sup>1</sup>H NMR (300 MHz, CDCl<sub>3</sub>): δ 7.70-7.54 (m, 4H), 7.53-7.29 (m, 8H), 6.78 (d, *J* = 8.0 Hz, 2H), 6.71 (dd, <sup>3</sup>J<sub>H-F</sub> = 42.3, <sup>3</sup>J<sub>H-P</sub> = 8.5 Hz, 1H), 3.70 (s, 3H), 1.3-0.8 (bm, 3H). <sup>13</sup>C NMR {<sup>1</sup>H} (75 MHz, CDCl<sub>3</sub>): δ 160.4 (d, *J* = 3.1 Hz, Cq), 150.9 (dd, <sup>1</sup>J<sub>C-F</sub> = 291.5, <sup>1</sup>J<sub>C-P</sub> 64.9 Hz, Cq), 133.0 (d, <sup>2</sup>J<sub>C-P</sub> = 10.0 Hz, 4xCH), 131.7 (m, 4xCH), 128.9 (d, <sup>3</sup>J<sub>C-P</sub> = 10.6 Hz, 4xCH), 126.9 (d, <sup>1</sup>J<sub>C-P</sub> = 61.2 Hz, 2xCq), 124.8 (d, *J* = 27.1 Hz, CH), 124.5 (dd, *J* = 11.8, 1.5 Hz, Cq), 114.2 (s, 2xCH), 55.3 (s, CH<sub>3</sub>). <sup>11</sup>B NMR (160 MHz, CDCl<sub>3</sub>): δ -38.2 (m). <sup>19</sup>F NMR (376 MHz,

CDCl<sub>3</sub>):  $\delta$  -118.9 (dd,  $^3J_{F-H} = 43.3$ ,  $^2J_{F-P} = 18.8$  Hz).  $^{31}\text{P}$  NMR (162 MHz, CDCl<sub>3</sub>):  $\delta$  20.4 (m). HRMS (ESI-TOF): calcd for C<sub>21</sub>H<sub>19</sub>FOP  $m/z$  337.1158 [M-BH<sub>3</sub>+H]<sup>+</sup>, found 337.1161.

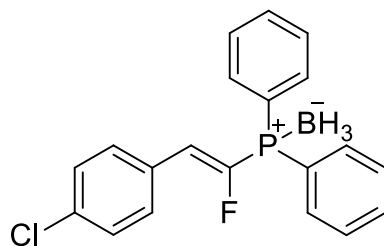

**(E)-((2-(4-Chlorophenyl)-1-fluorovinyl)diphenylphosphonio)trihydroborate 3f:** (*E*)-1-(2-bromo-2-fluorovinyl)-4-chlorobenzene (0.2 mmol, 47 mg), diphenylphosphine borane (0.22 mmol, 44 mg), Cs<sub>2</sub>CO<sub>3</sub> (0.24 mmol, 78 mg) in MeCN (1 mL) were reacted according to the general procedure. The crude product was chromatographed on neutral alumina eluting with pentane/DCM 9/1 to pentane/DCM 8/2 to afford the desired compound in 64% yield (45 mg) as a colourless solid. mp 119-121 °C. IR: 2376, 1492, 1434, 1108, 1091, 1055, 814 cm<sup>-1</sup>.  $^1\text{H}$  NMR (400 MHz, CDCl<sub>3</sub>):  $\delta$  7.75 (dd,  $J = 11.3$ , 7.5 Hz, 4H), 7.59-7.55 (m, 4H), 7.53-7.45 (m, 4H), 7.35 (d,  $J = 8.5$  Hz, 2H), 6.84 (dd,  $^3J_{H-F} = 42.1$  Hz,  $^3J_{H-P} = 8.8$  Hz, 1H), 1.6-0.9 (bm, 3H).  $^{13}\text{C}$  NMR { $^1\text{H}$ } (100 MHz, CDCl<sub>3</sub>):  $\delta$  153.6 (dd,  $^1J_{C-F} = 296.2$ ,  $^1J_{C-P} = 61.8$  Hz, Cq), 135.4 (d,  $J = 3.6$  Hz, Cq), 133.1 (d,  $^2J_{C-P} = 10.1$  Hz, 4xCH), 132.0 (d,  $^4J_{C-P} = 2.4$  Hz, 2xCH), 131.3 (d,  $J = 7.9$  Hz, 2xCH), 130.2 (dd,  $^3J = 11.5$ , 1.5 Hz, Cq), 129.4-128.7 (m, 6xCH), 126.4 (d,  $^1J_{C-P} = 61.0$  Hz, 2xCq), 123.9 (d,  $^2J = 26.6$  Hz, CH).  $^{11}\text{B}$  NMR (160 MHz, CDCl<sub>3</sub>):  $\delta$  -38.3 (m).  $^{19}\text{F}$  NMR (376 MHz, CDCl<sub>3</sub>):  $\delta$  -113.9 (dd,  $^3J_{F-H} = 42.1$ ,  $^2J_{F-P} = 17.0$  Hz).  $^{31}\text{P}$  NMR (162 MHz, CDCl<sub>3</sub>):  $\delta$  21.3 (m). HRMS (ESI-TOF): calcd for C<sub>20</sub>H<sub>16</sub><sup>35</sup>ClFP  $m/z$  341.0662 [M-BH<sub>3</sub>+H]<sup>+</sup>, found 341.0668.

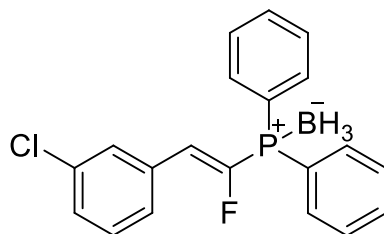

**(E)-((2-(3-Chlorophenyl)-1-fluorovinyl)diphenylphosphonio)trihydroborate 3g:** (*E*)-1-(2-bromo-2-fluorovinyl)-3-chlorobenzene (0.2 mmol, 47 mg), diphenylphosphine borane (0.22 mmol, 44 mg), Cs<sub>2</sub>CO<sub>3</sub> (0.24 mmol, 78 mg) in MeCN (1 mL) were reacted according to the general procedure. The crude product was chromatographed on neutral alumina eluting with pure pentane to pentane/DCM 8/2 to afford the desired compound in 49% yield (34 mg) as a



colourless solid. mp 99-101 °C. IR: 3057, 2924, 2388, 1561, 1472, 1435, 1053, 888, 820 cm<sup>-1</sup>. <sup>1</sup>H NMR (400 MHz, CDCl<sub>3</sub>): δ 7.75 (dd, *J* = 11.2, 7.6 Hz, 4H), 7.68 (s, 1H), 7.59-7.54 (m, 2H), 7.53-7.46 (m, 5H), 7.35-7.28 (m, 2H), 6.83 (dd, <sup>3</sup>*J*<sub>H-F</sub> = 41.7, <sup>3</sup>*J*<sub>H-P</sub> = 8.7 Hz, 1H), 1.6-0.9 (bm, 3H). <sup>13</sup>C NMR {<sup>1</sup>H} (100 MHz, CDCl<sub>3</sub>): δ 154.3 (dd, <sup>1</sup>*J*<sub>C-F</sub> = 297.5, <sup>1</sup>*J*<sub>C-P</sub> = 61.0 Hz, Cq), 134.8 (s, Cq), 133.3 (dd, <sup>3</sup>*J* = 11.4, 1.3 Hz, Cq), 133.1 (d, <sup>2</sup>*J*<sub>C-P</sub> = 10.0 Hz, 4xCH), 132.1 (d, <sup>4</sup>*J*<sub>C-P</sub> = 2.5 Hz, 2xCH), 130.1 (s, CH), 129.8 (d, *J* = 9.1 Hz, CH), 129.6 (d, *J* = 2.1 Hz, CH), 129.2 (d, <sup>3</sup>*J*<sub>C-P</sub> = 10.6 Hz, 4xCH), 128.2 (d, *J* = 6.9 Hz, CH), 126.3 (d, <sup>1</sup>*J*<sub>C-P</sub> = 60.9 Hz, 2xCq), 123.7 (d, *J* = 26.4 Hz, CH). <sup>11</sup>B NMR (160 MHz, CDCl<sub>3</sub>): δ -38.3 (m). <sup>19</sup>F NMR (376 MHz, CDCl<sub>3</sub>): δ -112.3 (dd, <sup>3</sup>*J*<sub>F-H</sub> = 41.7, <sup>2</sup>*J*<sub>F-P</sub> = 17.2 Hz). <sup>31</sup>P NMR (162 MHz, CDCl<sub>3</sub>): δ 21.6 (m). HRMS (ESI-TOF): calcd for C<sub>20</sub>H<sub>16</sub><sup>35</sup>ClFP *m/z* 341.0662 [M-BH<sub>3</sub>+H]<sup>+</sup>, found 341.0659.

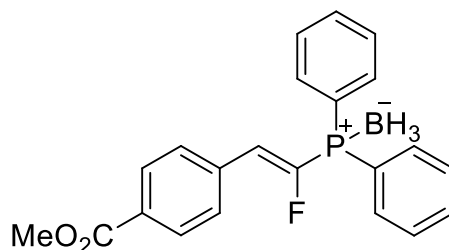

**(E)-((2-(4-(Methoxycarbonyl)phenyl)-1-fluorovinyl)diphenylphosphonio)trihydroborate**  
**3h:** (*E*)-methyl 4-(2-bromo-2-fluorovinyl)benzoate (0.2 mmol, 52 mg), diphenylphosphine borane (0.22 mmol, 44 mg), Cs<sub>2</sub>CO<sub>3</sub> (0.24 mmol, 78 mg) in MeCN (1 mL) were reacted according to the general procedure. The crude product was chromatographed on neutral alumina eluting with pentane/DCM 9/1 to pentane/DCM 8/2 to afford the desired compound in 85% yield (64 mg) as a colourless solid. mp 147-149 °C. IR: 2924, 2849, 2384, 1717, 1436, 1412, 1280, 1185, 1107, 1053, 894, 828 cm<sup>-1</sup>. <sup>1</sup>H NMR (400 MHz, CDCl<sub>3</sub>): δ 8.04 (d, <sup>3</sup>*J*<sub>H-H</sub> = 8.4 Hz, 2H), 7.79-7.72 (m, 4H), 7.69 (d, <sup>3</sup>*J*<sub>H-H</sub> = 8.4 Hz, 2H), 7.59-7.54 (m, 2H), 7.53-7.46 (m, 4H), 6.91 (dd, <sup>3</sup>*J*<sub>H-F</sub> = 41.9, <sup>3</sup>*J*<sub>H-P</sub> = 8.7 Hz, 1H), 3.92 (s, 3H), 1.6-0.8 (bm, 3H). <sup>13</sup>C NMR {<sup>1</sup>H} (100 MHz, CDCl<sub>3</sub>): δ 166.6 (s, Cq), 155.0 (dd, <sup>1</sup>*J*<sub>C-F</sub> = 299.1, <sup>1</sup>*J*<sub>C-P</sub> = 60.4 Hz, Cq), 135.9 (d, <sup>3</sup>*J* = 11.2 Hz, Cq), 133.1 (d, <sup>2</sup>*J*<sub>C-P</sub> = 10.1 Hz, 4xCH), 132.1 (d, <sup>4</sup>*J*<sub>C-P</sub> = 2.5 Hz, 2xCH), 130.6 (d, *J* = 2.4 Hz, Cq), 130.0 (s, 2xCH), 129.9 (d, *J* = 7.9 Hz, 2xCH), 129.2 (d, <sup>3</sup>*J*<sub>C-P</sub> = 10.7 Hz, 4xCH), 126.2 (d, <sup>1</sup>*J*<sub>C-P</sub> = 60.8 Hz, 2xCq), 123.9 (d, <sup>2</sup>*J* = 26.2 Hz, CH), 52.4 (s, OCH<sub>3</sub>). <sup>11</sup>B NMR (160 MHz, CDCl<sub>3</sub>): δ -38.5 (m). <sup>19</sup>F NMR (376 MHz, CDCl<sub>3</sub>): δ -111.0 (dd, <sup>3</sup>*J*<sub>F-H</sub> = 41.9, <sup>2</sup>*J*<sub>F-P</sub> = 17.5 Hz). <sup>31</sup>P NMR (122 MHz, CDCl<sub>3</sub>): δ 21.7 (m). HRMS (ESI-TOF): calcd for C<sub>22</sub>H<sub>19</sub>FO<sub>2</sub>P *m/z* 365.1107 [M-BH<sub>3</sub>+H]<sup>+</sup>, found 365.1106.

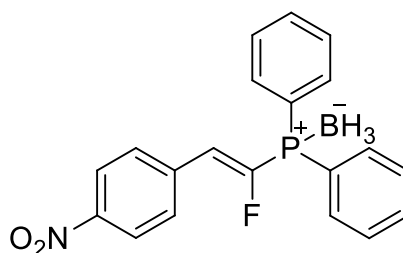

**(E)-((2-(4-Nitrophenyl)-1-fluorovinyl)diphenylphosphonio)trihydroborate 3i:** (*E*)-1-(2-bromo-2-fluorovinyl)-4-nitrobenzene (0.20 mmol, 49 mg), diphenylphosphine borane (0.22 mmol, 44 mg), Cs<sub>2</sub>CO<sub>3</sub> (0.24 mmol, 78 mg) in MeCN (1 mL) were reacted according to the general procedure. The crude product was chromatographed on neutral alumina eluting with pure pentane to pentane/DCM 1/1 to afford the desired compound in 53% yield (39 mg) as a colourless solid. mp 153-155 °C. IR: 3061, 2418, 1644, 1594, 1511, 1436, 1344, 1289, 1107, 1056, 885, 859, 843, 827 cm<sup>-1</sup>. <sup>1</sup>H NMR (300 MHz, CDCl<sub>3</sub>): δ 8.23 (d, *J* = 8.8 Hz, 2H), 7.89-7.67 (m, 6H), 7.65-7.38 (m, 6H), 6.94 (dd, <sup>3</sup>*J*<sub>H-F</sub> = 41.0, <sup>3</sup>*J*<sub>H-P</sub> = 8.6 Hz, 1H), 1.4-0.7 (bm, 3H). <sup>13</sup>C NMR {<sup>1</sup>H} (75 MHz, CDCl<sub>3</sub>): δ 156.7 (dd, <sup>1</sup>*J*<sub>C-F</sub> = 302.4, <sup>1</sup>*J*<sub>C-P</sub> = 58.1 Hz, Cq), 147.8 (s, Cq), 137.8 (d, <sup>3</sup>*J* = 11.3 Hz, Cq), 133.1 (d, <sup>2</sup>*J*<sub>C-P</sub> = 10.1 Hz, 4xCH), 132.3 (s, 2xCH), 130.7 (d, *J* = 8.0 Hz, 2xCH), 129.3 (d, <sup>3</sup>*J*<sub>C-P</sub> = 10.7 Hz, 4xCH), 125.8 (d, <sup>1</sup>*J* = 60.7 Hz, 2xCq), 124.1 (s, 2xCH), 122.6 (d, <sup>2</sup>*J* = 26.1 Hz, CH). <sup>11</sup>B NMR (120 MHz, CDCl<sub>3</sub>): δ -38.5 (m). <sup>19</sup>F NMR (282 MHz, CDCl<sub>3</sub>): δ -108.6 (dd, <sup>3</sup>*J*<sub>F-H</sub> = 41.0, <sup>3</sup>*J*<sub>F-P</sub> = 16.5 Hz). <sup>31</sup>P NMR (122 MHz, CDCl<sub>3</sub>): δ 22.2 (m). HRMS (FD-TOF): calcd for C<sub>20</sub>H<sub>15</sub>FNO<sub>2</sub>P *m/z* 351.0824 [M-BH<sub>3</sub>]<sup>+</sup>, found 351.0826.

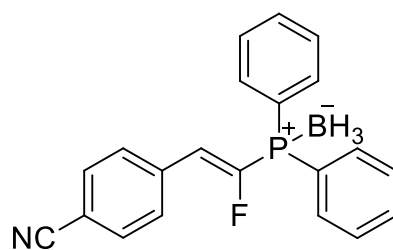

**(E)-((2-(4-Cyanophenyl)-1-fluorovinyl)diphenylphosphonio)trihydroborate 3j:** (*E*)-4-(2-bromo-2-fluorovinyl)benzonitrile (0.2 mmol, 45 mg), diphenylphosphine borane (0.22 mmol, 44 mg), Cs<sub>2</sub>CO<sub>3</sub> (0.24 mmol, 78 mg) in MeCN (1 mL) were reacted according to the general procedure. The crude product was chromatographed on neutral alumina eluting with pentane/DCM 8/2 to afford the desired compound in 82% yield (51 mg) as a colourless solid. mp 131-133 °C. IR: 3053, 2401, 2350, 2230, 1435, 1050, 887, 839, 828 cm<sup>-1</sup>. <sup>1</sup>H NMR (300 MHz, CDCl<sub>3</sub>): δ 7.98- 7.37 (m, 14H), 6.89 (dd, <sup>3</sup>*J*<sub>H-F</sub> = 41.2, <sup>3</sup>*J*<sub>H-P</sub> = 8.2 Hz, 1H), 1.5-0.8 (bm, 3H). <sup>13</sup>C NMR {<sup>1</sup>H} (75 MHz, CDCl<sub>3</sub>): δ 156.1 (dd, <sup>1</sup>*J*<sub>C-F</sub> = 301.3, <sup>1</sup>*J*<sub>C-P</sub> = 58.6 Hz, Cq), 135.9 (d, *J* = 11.3 Hz, Cq), 133.0 (d, <sup>2</sup>*J*<sub>C-P</sub> = 10.1 Hz, 4xCH), 132.5 (s, 2xCH), 132.2 (d, <sup>4</sup>*J*<sub>C-P</sub> = 2.4

Hz, 2xCH), 130.4 (d,  $J = 8.0$  Hz, 2xCH), 129.2 (d,  $^3J_{C-P} = 10.7$  Hz, 4xCH), 125.8 (d,  $^1J_{C-P} = 60.8$  Hz, 2xCq), 123.0 (d,  $J = 26.1$  Hz, CH), 118.5 (s, Cq), 112.7 (d,  $J = 3.0$  Hz, Cq).  $^{11}\text{B}$  NMR (160 MHz,  $\text{CDCl}_3$ ):  $\delta$  -38.4 (m).  $^{19}\text{F}$  NMR (376 MHz,  $\text{CDCl}_3$ ):  $\delta$  -109.7 (dd,  $^3J_{F-H} = 41.2$ ,  $^2J_{F-P} = 19.2$  Hz).  $^{31}\text{P}$  NMR (162 MHz,  $\text{CDCl}_3$ ):  $\delta$  -21.9 (m). HRMS (ESI-TOF): calcd for  $\text{C}_{21}\text{H}_{16}\text{FNP}$   $m/z$  332.1004  $[\text{M-BH}_3+\text{H}]^+$ , found 332.1002.

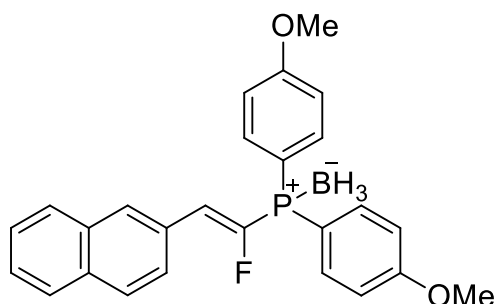

**(E)-((1-Fluoro-2-(naphth-2-yl)vinyl)-bis(4-methoxyphenyl)phosphonio)trihydroborate**

**3k:** (*E*)-2-(2-bromo-2-fluorovinyl)naphthalene (0.20 mmol, 50 mg), bis(4-methoxyphenyl)phosphine borane (0.22 mmol, 57 mg),  $\text{Cs}_2\text{CO}_3$  (0.24 mmol, 78 mg) in MeCN (1 mL) were reacted according to the general procedure. The crude product was chromatographed on neutral alumina eluting with pure pentane to pentane/DCM 1/1 to afford the desired compound in 38% yield (30 mg) as a sticky colourless solid. IR: 2923, 2355, 1593, 1569, 1500, 1455, 1300, 1257, 1177, 1108, 1054, 1028, 903, 826  $\text{cm}^{-1}$ .  $^1\text{H}$  NMR (300 MHz,  $\text{CDCl}_3$ ):  $\delta$  8.08 (s, 1H), 7.84-7.68 (m, 8H), 7.54-7.44 (m, 2H), 7.05-6.83 (m, 5H), 3.85 (s, 6H), 1.4-0.9 (bm, 3H).  $^{13}\text{C}$  NMR  $\{^1\text{H}\}$  (75 MHz,  $\text{CDCl}_3$ ):  $\delta$  162.6 (d,  $^4J_{C-P} = 2.4$  Hz, 2xCq), 154.1 (dd,  $^1J_{C-F} = 295.0$ ,  $^1J_{C-P} = 63.3$  Hz, Cq), 134.8 (d,  $J_{C-P} = 11.3$  Hz, 4xCH), 133.5 (d,  $J = 1.8$  Hz, Cq), 133.3 (s, Cq), 130.2 (d,  $J = 7.6$  Hz, CH), 129.5 (dd,  $J = 11.2, 1.7$  Hz, Cq), 128.6 (s,  $J = 16.2$  Hz, CH), 128.4 (s, CH), 127.7 (s, CH), 127.2 (s, CH), 126.9 (d,  $J = 7.9$  Hz, CH), 126.6 (s, CH), 124.2 (d,  $^2J = 26.0$  Hz, CH), 117.5 (d,  $^1J_{C-P} = 66.4$  Hz, 2xCq), 114.8 (d,  $J_{C-P} = 11.6$  Hz, 4xCH), 55.5 (s, 2xOCH<sub>3</sub>).  $^{11}\text{B}$  NMR (120 MHz,  $\text{CDCl}_3$ ):  $\delta$  -38.0 (m).  $^{19}\text{F}$  NMR (282 MHz,  $\text{CDCl}_3$ ):  $\delta$  -114.8 (dd,  $^3J_{F-H} = 42.8$ ,  $^2J_{F-P} = 20.6$  Hz).  $^{31}\text{P}$  NMR (122 MHz,  $\text{CDCl}_3$ ):  $\delta$  18.4 (m). HRMS (FD-TOF): calcd for  $\text{C}_{26}\text{H}_{22}\text{FO}_2\text{P}$   $m/z$  416.1341  $[\text{M-BH}_3]^+$ , found 416.1349.

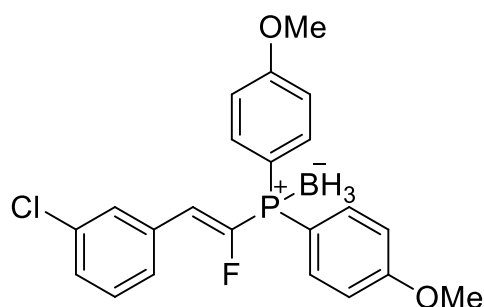

**(E)-((2-(3-Chlorophenyl)-1-fluorovinyl)-bis(4-methoxyphenyl)phosphonio)trihydroborate 3l:** (*E*)-1-(2-bromo-2-fluorovinyl)-3-chlorobenzene (0.20 mmol, 47 mg), bis(4-methoxyphenyl)phosphine borane (0.22 mmol, 57 mg), Cs<sub>2</sub>CO<sub>3</sub> (0.24 mmol, 78 mg) in MeCN (1 mL) were reacted according to the general procedure. The crude product was chromatographed on neutral alumina eluting with pure pentane to pentane/DCM 7/3 to afford the desired compound in 18% yield (12 mg) as a sticky colourless solid. IR: 2924, 2389, 1725, 1436, 1107, 1054, 812 cm<sup>-1</sup>. <sup>1</sup>H NMR (300 MHz, CDCl<sub>3</sub>): δ 7.66 (m, 5H), 7.44 (m, 1H), 7.30 (m, 2H), 6.98 (m, 4H), 6.72 (dd, <sup>3</sup>J<sub>H-F</sub> = 41.9, <sup>3</sup>J<sub>H-P</sub> = 8.5 Hz, 1H), 3.85 (s, 6H), 1.4-0.8 (bm, 3H). Selected <sup>13</sup>C NMR {<sup>1</sup>H} (75 MHz, CDCl<sub>3</sub>): δ 162.7 (d, <sup>4</sup>J<sub>C-P</sub> = 2.4 Hz, 2xCq), 134.8 (m, 4xCH+Cq), 133.5 (dd, *J* = 11.1, 1.3 Hz, Cq), 130.0 (s, CH), 129.8 (d, *J* = 9.0 Hz, CH), 129.4 (d, *J* = 2.1 Hz, CH), 128.2 (d, *J* = 7.0 Hz, CH), 122.6 (d, <sup>2</sup>*J* = 25.9 Hz, CH), 117.1 (d, <sup>1</sup>J<sub>C-P</sub> = 66.4 Hz, 2xCq), 114.8 (d, <sup>3</sup>J<sub>C-P</sub> = 11.6 Hz, 4xCH), 55.5 (s, CH<sub>3</sub>). <sup>11</sup>B NMR (120 MHz, CDCl<sub>3</sub>): δ -38.7 (m). <sup>19</sup>F NMR (282 MHz, CDCl<sub>3</sub>): δ -112.6 (dd, <sup>3</sup>J<sub>F-H</sub> = 41.9, <sup>2</sup>J<sub>F-P</sub> = 20.2 Hz). <sup>31</sup>P NMR (122 MHz, CDCl<sub>3</sub>): δ 18.7 (m). HRMS (ESI-TOF): calcd for C<sub>22</sub>H<sub>20</sub><sup>35</sup>ClFO<sub>2</sub>P *m/z* 401.0873 [M-BH<sub>3</sub>+H]<sup>+</sup>, found 401.0867.

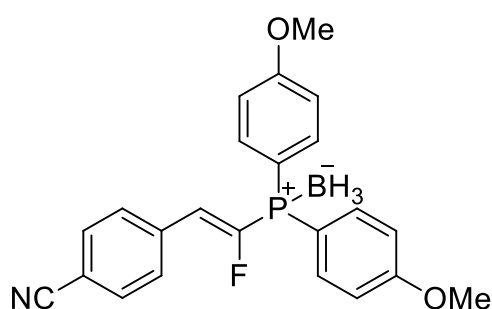

**(E)-((2-(4-Cyanophenyl)-1-fluorovinyl)-bis(4-methoxyphenyl)phosphonio)trihydroborate 3m:** (*E*)-4-(2-bromo-2-fluorovinyl)benzotrinitrile (0.20 mmol, 45 mg), bis(4-methoxyphenyl)phosphine borane (0.22 mmol, 57 mg), Cs<sub>2</sub>CO<sub>3</sub> (0.24 mmol, 78 mg) in MeCN (1 mL) were reacted according to the general procedure. The crude product was chromatographed on neutral alumina eluting with pure pentane to pentane/DCM 1/1 to afford the desired compound in 47% yield (42 mg) as a sticky colourless solid. IR: 2932, 2839, 2388, 2228, 1594, 1500, 1292, 1254, 1179, 1107, 826, 800 cm<sup>-1</sup>. <sup>1</sup>H NMR (300 MHz, CDCl<sub>3</sub>): δ 7.71-

7.61 (m, 8H), 7.00 (dd,  $J = 8.3, 1.7$  Hz, 4H), 6.79 (dd,  $^3J_{\text{H-F}} = 41.4, ^3J_{\text{H-P}} = 8.3$  Hz, 1H), 3.85 (s, 6H), 1.4-0.9 (bm, 3H).  $^{13}\text{C}$  NMR  $\{^1\text{H}\}$  (75 MHz,  $\text{CDCl}_3$ ):  $\delta$  162.7 (d,  $^4J_{\text{C-P}} = 2.4$  Hz, 2xCq), 157.1 (dd,  $^1J_{\text{C-F}} = 301.0, ^1J_{\text{C-P}} = 59.2$  Hz, Cq), 136.1 (d,  $J = 11.0$  Hz, Cq), 134.8 (d,  $^2J_{\text{C-P}} = 11.5$  Hz, 4xCH), 132.5 (s, 2xCH), 130.3 (d,  $J = 8.1$  Hz, 2xCH), 121.9 (d,  $^2J = 25.5$  Hz, CH), 118.6 (s, Cq), 116.5 (d,  $^1J_{\text{C-P}} = 66.3$  Hz, 2xCq), 114.9 (d,  $^3J_{\text{C-P}} = 11.6$  Hz, 4xCH), 112.5 (d,  $J = 3.0$  Hz, Cq), 55.5 (s, 2xOCH<sub>3</sub>).  $^{11}\text{B}$  NMR (120 MHz,  $\text{CDCl}_3$ ):  $\delta$  -38.1 (m).  $^{19}\text{F}$  NMR (282 MHz,  $\text{CDCl}_3$ ):  $\delta$  -109.4 (dd,  $^3J_{\text{F-H}} = 41.4, ^2J_{\text{F-P}} = 19.8$  Hz).  $^{31}\text{P}$  NMR (122 MHz,  $\text{CDCl}_3$ ):  $\delta$  19.1 (m). HRMS (FD-TOF): calcd for  $\text{C}_{23}\text{H}_{19}\text{FNO}_2\text{P}$   $m/z$  391.1137  $[\text{M-BH}_3]^+$ , found 391.1148.

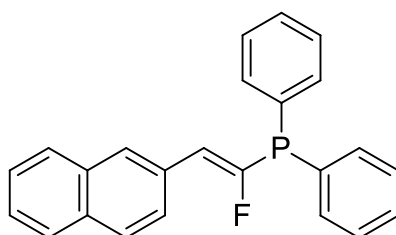

**(E)-(1-Fluoro-2-(naphth-2-yl)vinyl)diphenylphosphine 3a'**: *(E)*-2-(2-bromo-2-fluorovinyl)naphthalene (0.20 mmol, 50 mg), diphenylphosphine borane (0.22 mmol, 44 mg),  $\text{Cs}_2\text{CO}_3$  (0.24 mmol, 78 mg) in MeCN (1 mL) were reacted according to the general procedure, at 60 °C overnight. The crude product was chromatographed on silica gel eluting with pentane/toluene 9/1 to 5/5 to afford the desired compound in 43% yield (31 mg) as a colourless solid. mp 139-141 °C. IR: 3058, 2924, 2852, 1727, 1584, 1479, 1430, 1273, 1042, 906, 828  $\text{cm}^{-1}$ .  $^1\text{H}$  NMR (300 MHz,  $\text{CDCl}_3$ ):  $\delta$  8.04 (s, 1H), 7.9-7.7 (m, 4H), 7.7-7.6 (m, 4H), 7.5-7.3 (m, 8H), 6.51 (dd,  $^3J_{\text{H-F}} = 41.0, ^3J_{\text{H-P}} = 9.4$  Hz, 1H).  $^{13}\text{C}$  NMR  $\{^1\text{H}\}$  (75 MHz,  $\text{CDCl}_3$ ):  $\delta$  161.6 (dd,  $^1J_{\text{C-F}} = 313.6, ^1J_{\text{C-P}} = 28.9$  Hz, Cq), 134.4 (dd,  $J = 6.4, 2.8$  Hz, 2xCq), 133.6 (d,  $^2J_{\text{C-P}} = 19.3$  Hz, 4xCH), 133.4 (s, Cq), 133.1 (d,  $J = 1.9$  Hz, Cq), 130.7 (dd,  $^3J = 11.9, 2.1$  Hz, Cq), 129.4 (s, 2xCH), 129.0 (d,  $J = 8.1$  Hz, CH), 128.8 (d,  $^3J_{\text{C-P}} = 7.1$  Hz, 4xCH), 128.4 (s, CH), 128.2 (s, CH), 127.7 (s, CH), 126.9 (d,  $J = 8.0$  Hz, CH), 126.6 (s, CH), 126.4 (s, CH), 123.8 (dd,  $^2J_{\text{C-F}} = 39.3, ^2J_{\text{C-P}} = 4.3$  Hz, CH).  $^{19}\text{F}$  NMR (282 MHz,  $\text{CDCl}_3$ ):  $\delta$  -104.4 (dd,  $^3J_{\text{F-H}} = 41.1, ^2J_{\text{F-P}} = 14.5$  Hz).  $^{31}\text{P}$  NMR (122 MHz,  $\text{CDCl}_3$ ):  $\delta$  -5.4 (m). HRMS (ESI-TOF): calcd for  $\text{C}_{24}\text{H}_{19}\text{OFP}$   $m/z$  373.1158  $[\text{M}(\text{O})+\text{H}]^+$ , found 373.1163.

## 5. NMR spectra for compounds 3a-3m

### (*E*)-((1-Fluoro-2-(naphth-2-yl)vinyl)diphenylphosphonio)trihydroborate 3a

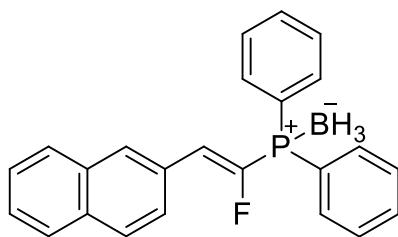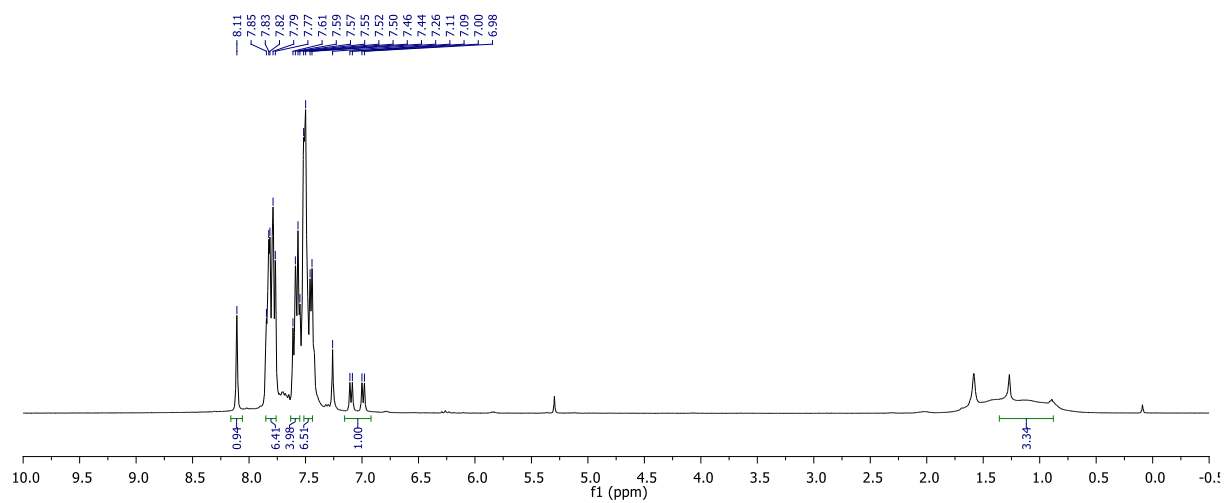

<sup>1</sup>H NMR in CDCl<sub>3</sub>

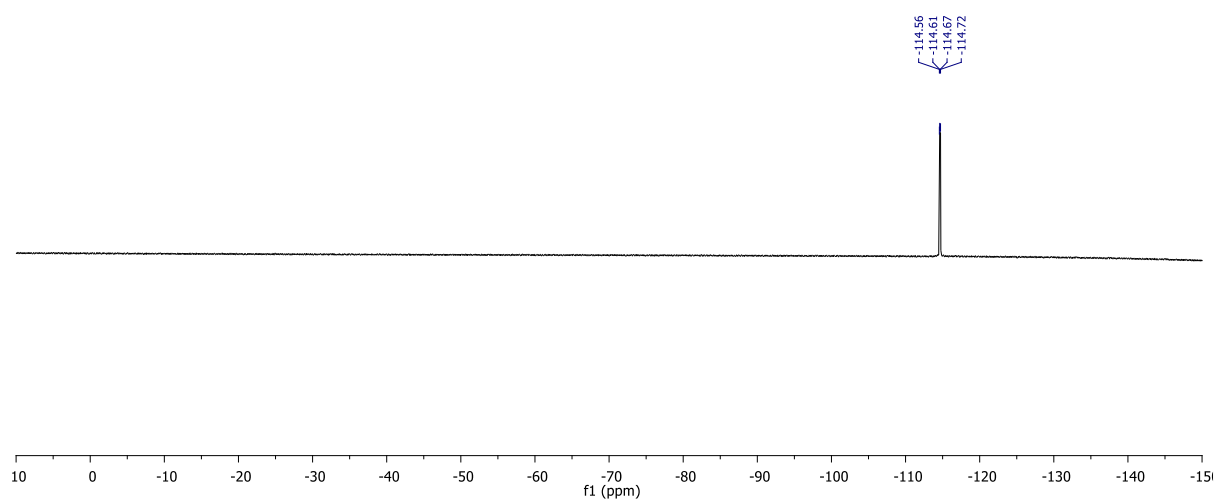

<sup>19</sup>F NMR in CDCl<sub>3</sub>

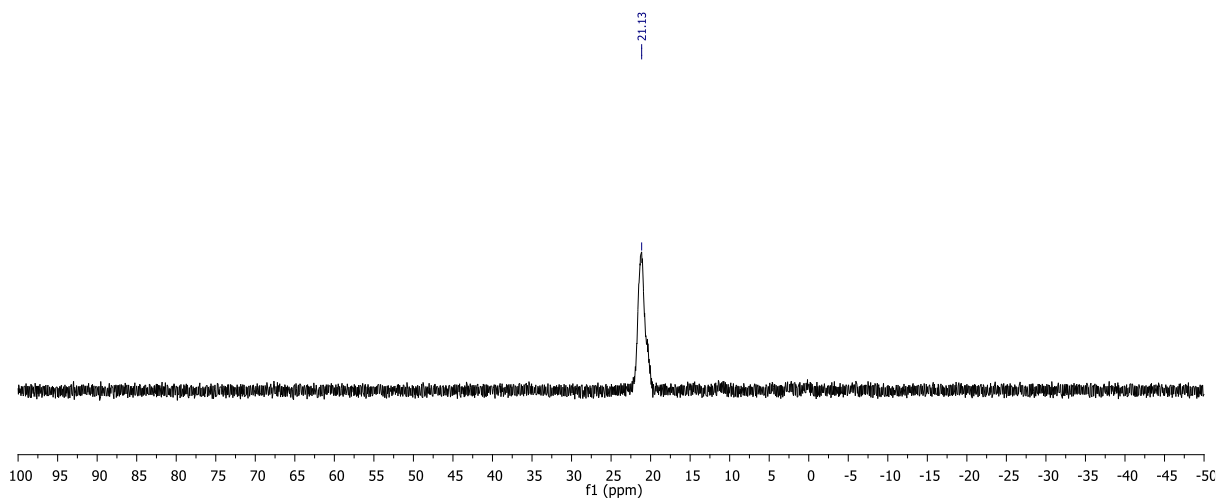

**<sup>31</sup>P NMR in CDCl<sub>3</sub>**

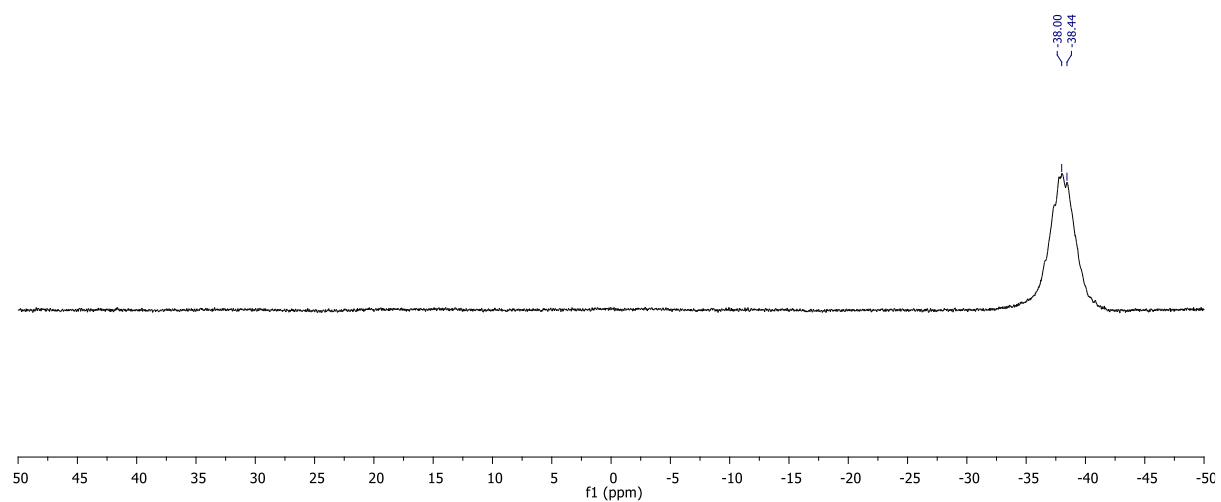

**<sup>11</sup>B NMR in CDCl<sub>3</sub>**

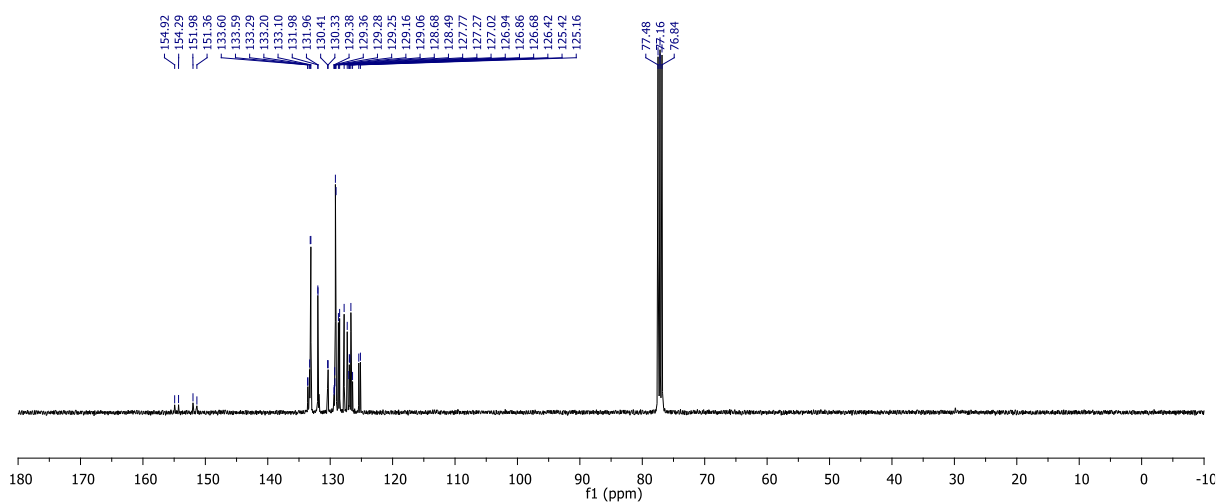

**<sup>13</sup>C NMR {<sup>1</sup>H} in CDCl<sub>3</sub>**

**(E)-((1-Fluoro-2-phenylvinyl)diphenylphosphonio)trihydroborate 3b**

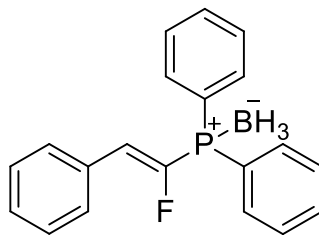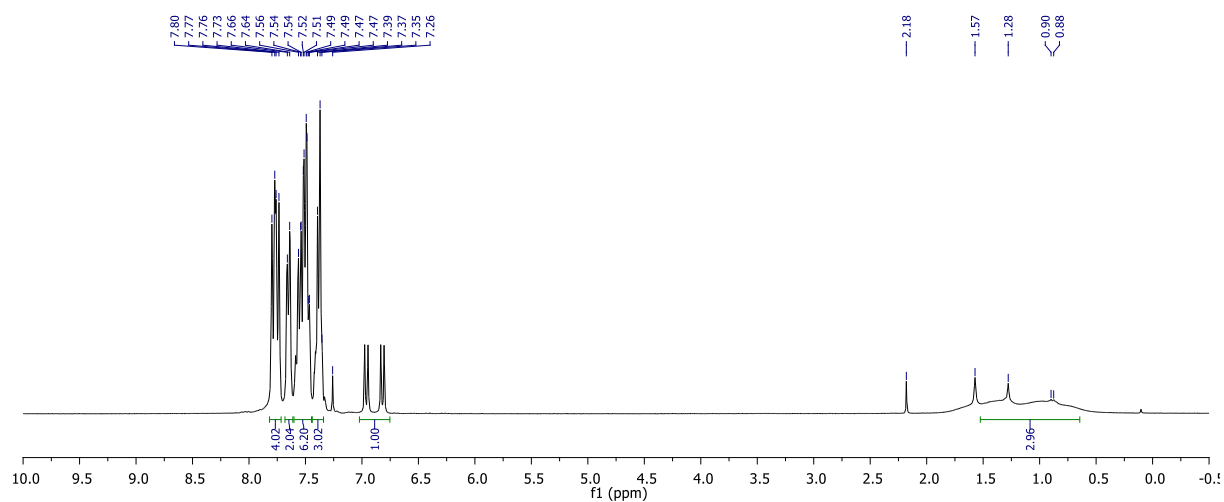

**<sup>1</sup>H NMR in CDCl<sub>3</sub>**

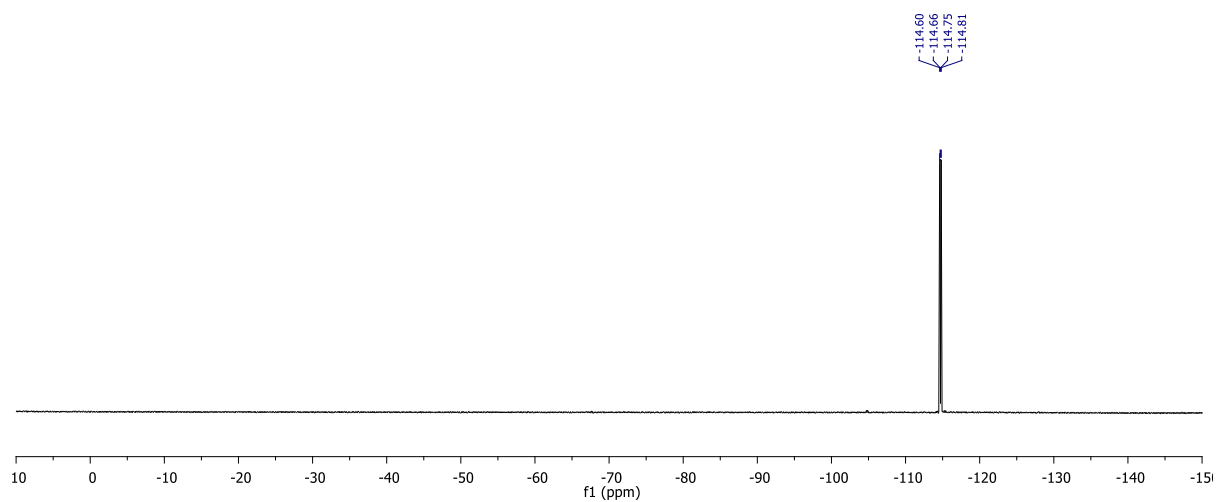

**<sup>19</sup>F NMR in CDCl<sub>3</sub>**



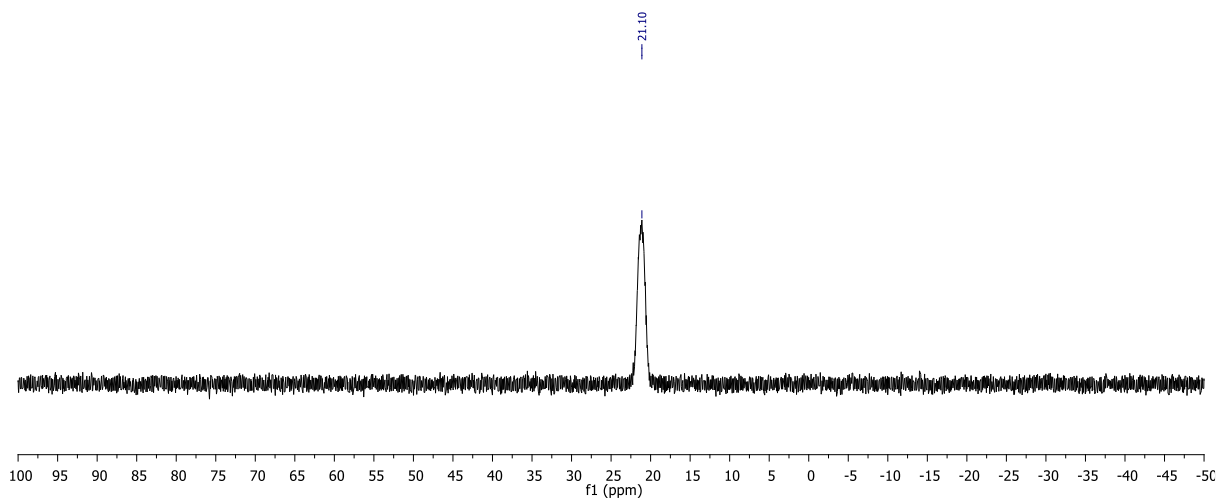

$^{31}\text{P}$  NMR in  $\text{CDCl}_3$

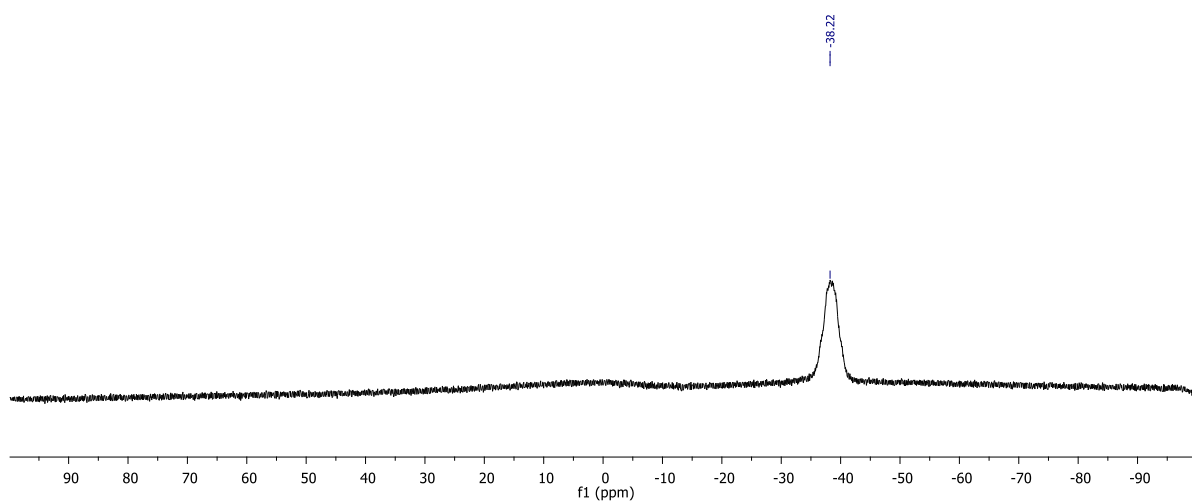

$^{11}\text{B}$  NMR in  $\text{CDCl}_3$

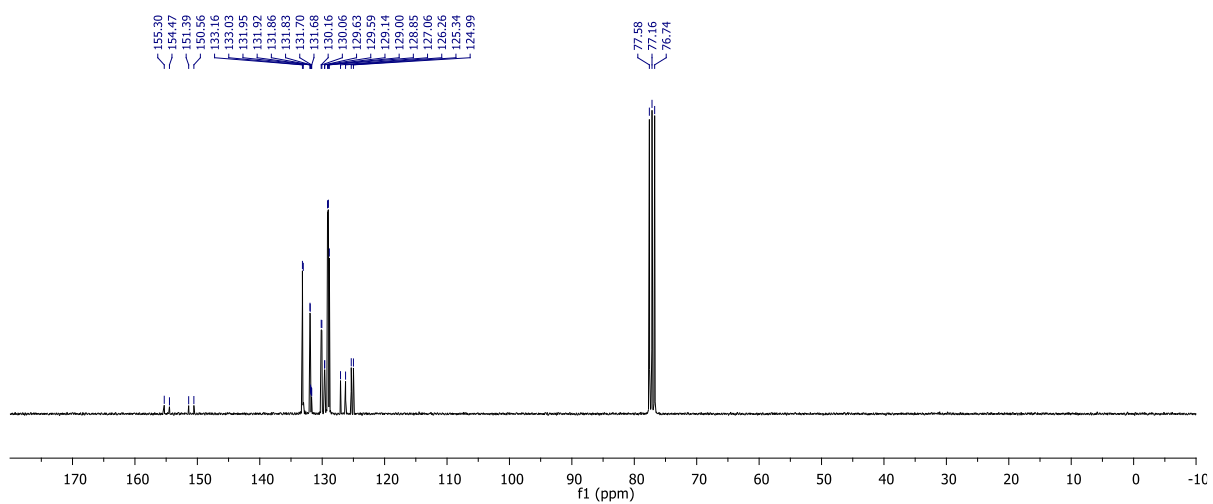

$^{13}\text{C}$  NMR ( $^1\text{H}$ ) in  $\text{CDCl}_3$

**(E)-((1-Fluoro-2-(p-tolyl)vinyl)diphenylphosphonio)trihydroborate 3c**

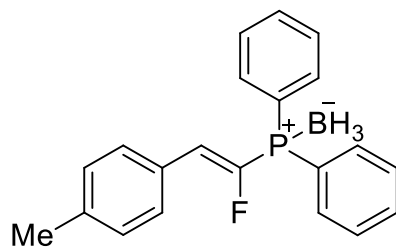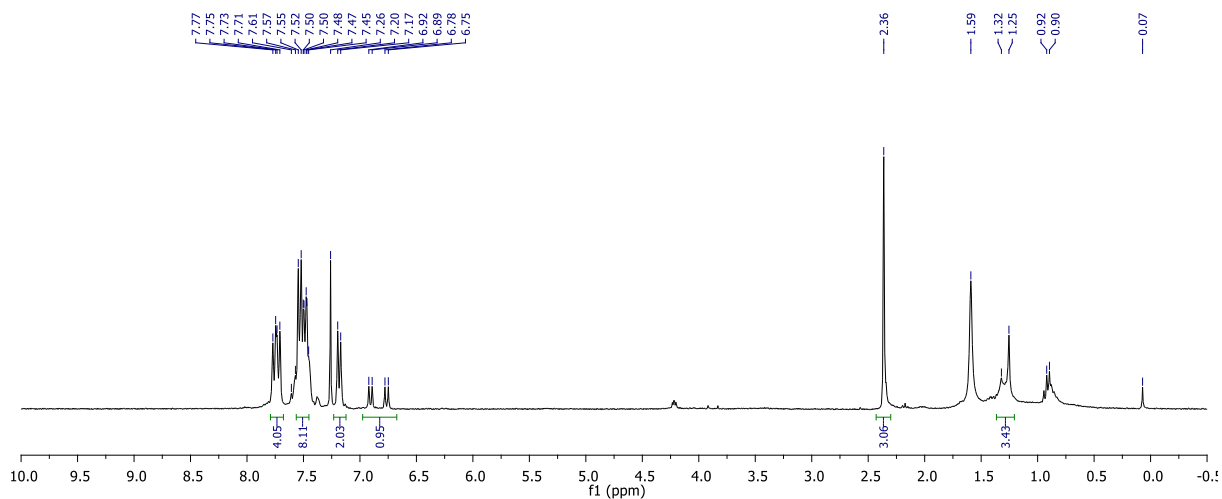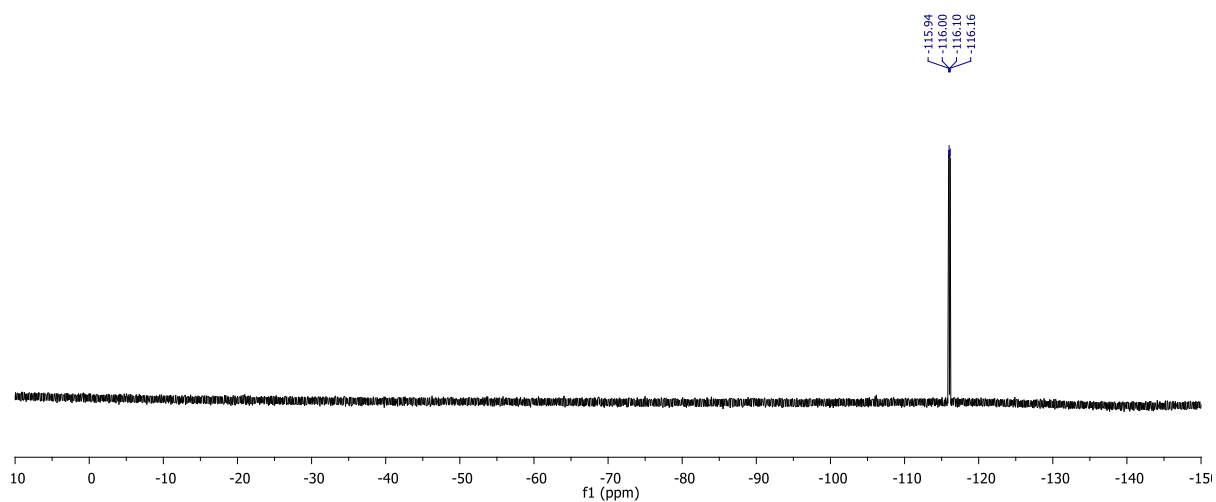

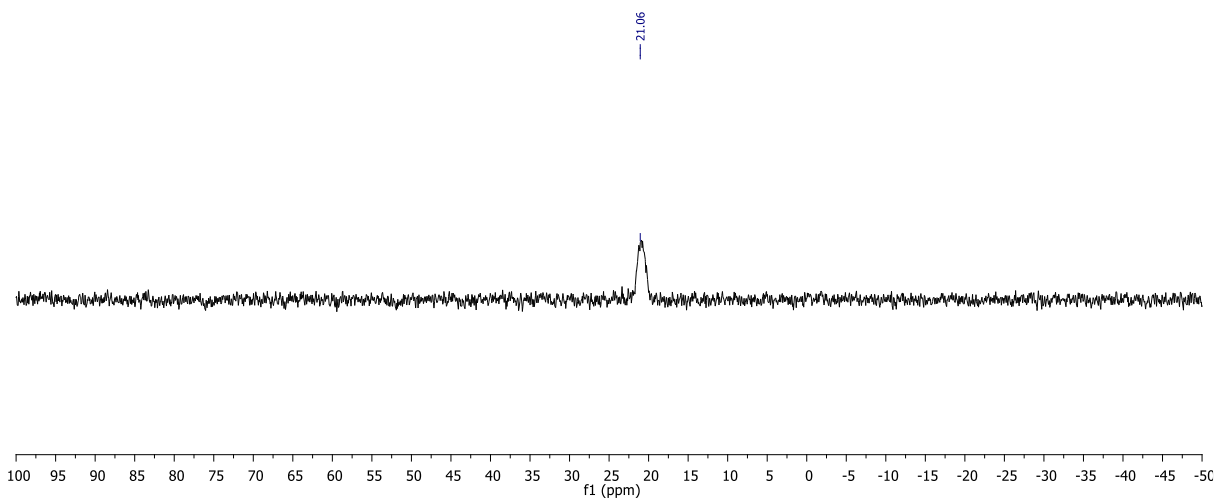

$^{31}\text{P}$  NMR in  $\text{CDCl}_3$

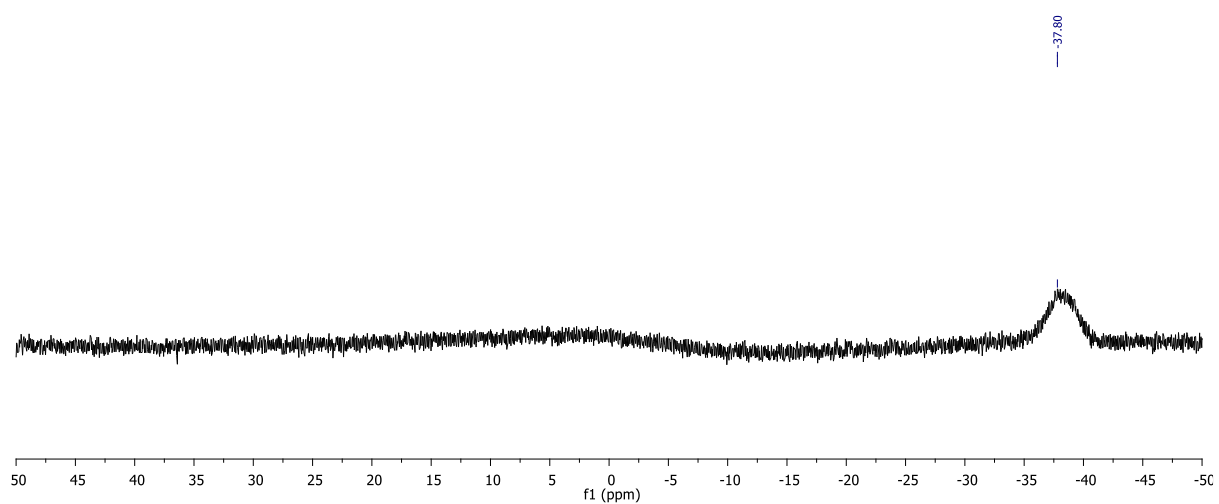

$^{11}\text{B}$  NMR in  $\text{CDCl}_3$

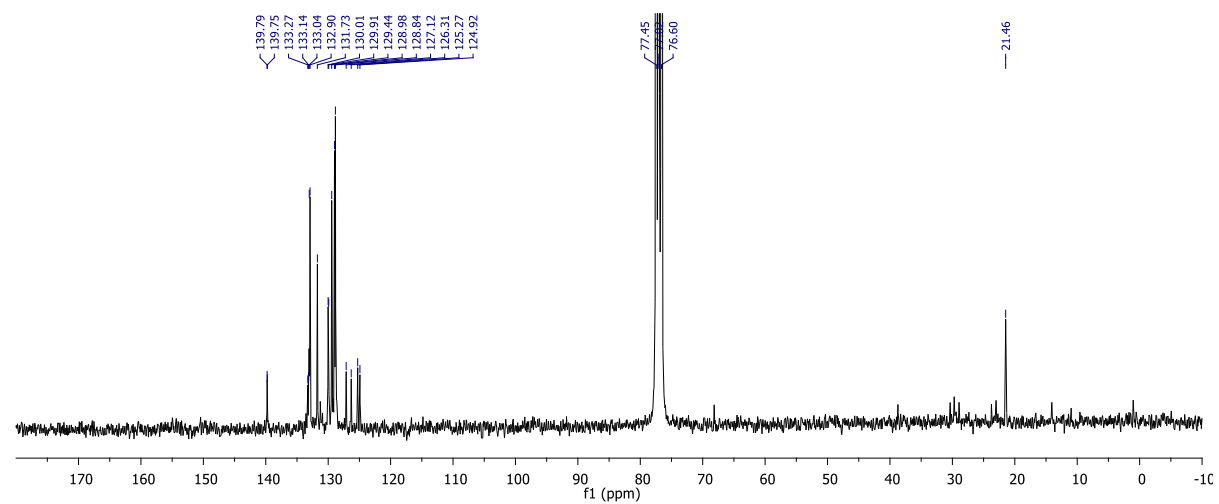

$^{13}\text{C}$  NMR ( $\{^1\text{H}\}$ ) in  $\text{CDCl}_3$

**(E)-((1-Fluoro-2-(*o*-tolyl)vinyl)diphenylphosphonio)trihydroborate 3d**

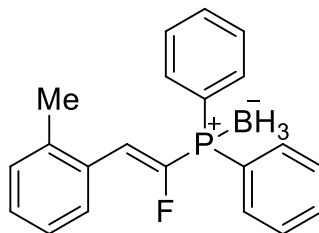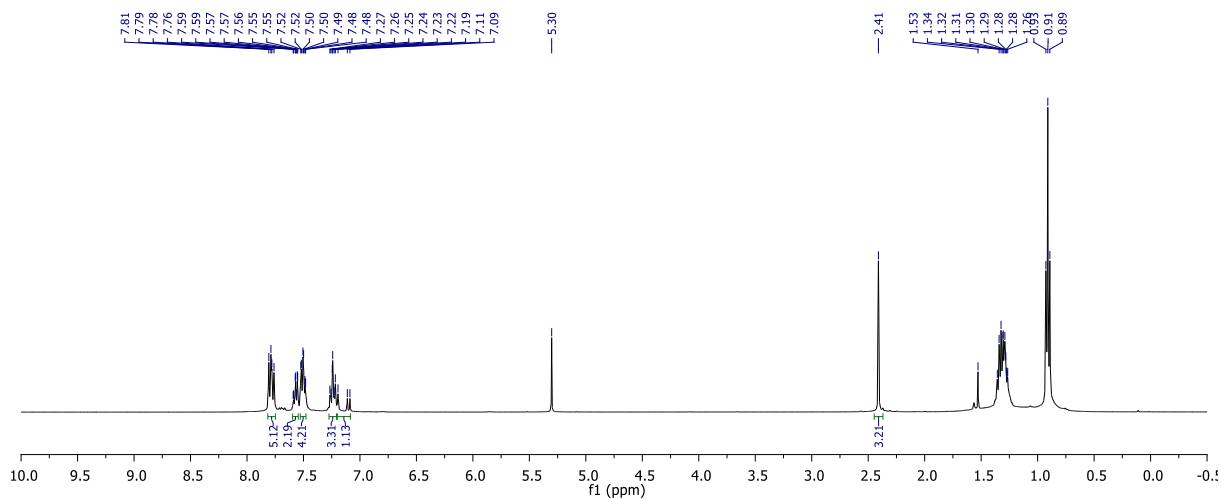

**<sup>1</sup>H NMR in CDCl<sub>3</sub>**

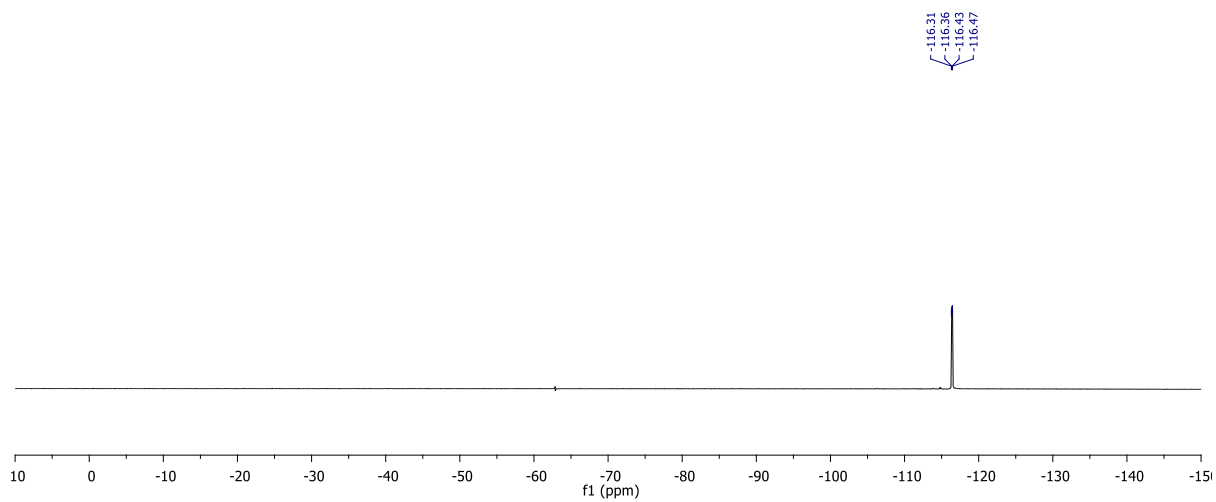

**<sup>19</sup>F NMR in CDCl<sub>3</sub>**

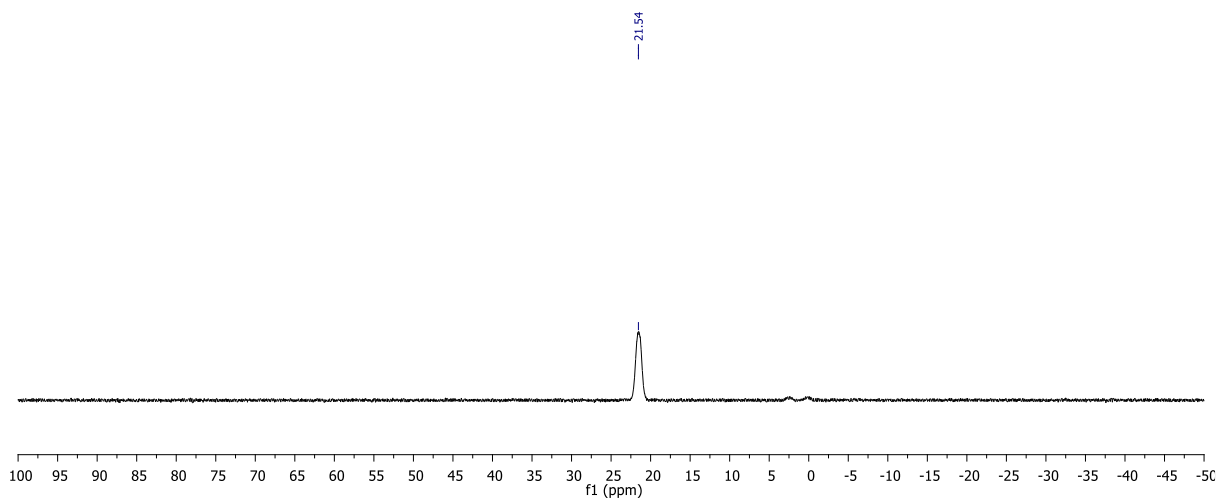

$^{31}\text{P}$  NMR in  $\text{CDCl}_3$

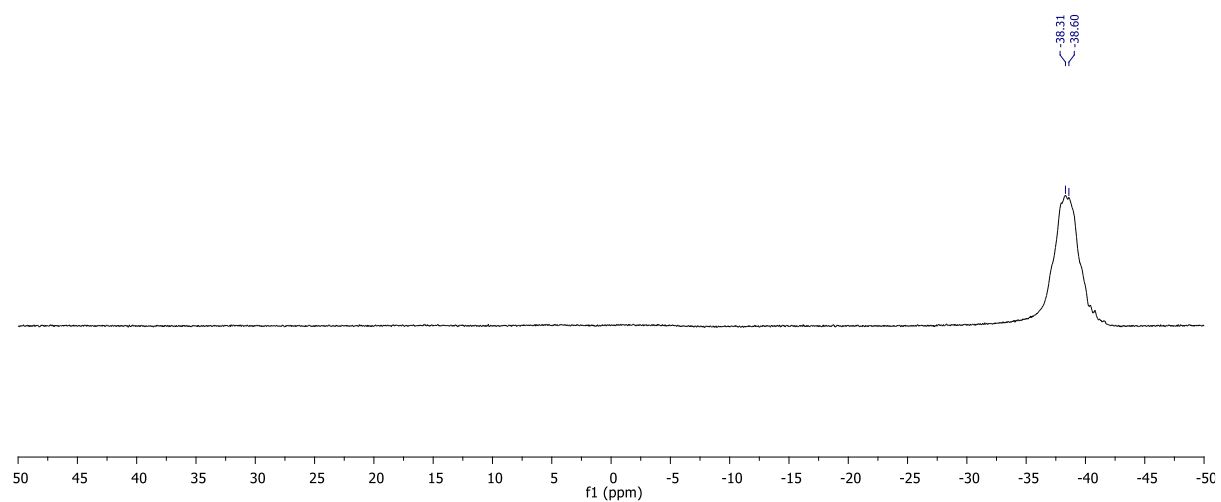

$^{11}\text{B}$  NMR in  $\text{CDCl}_3$

**(E)-((2-(4-Methoxyphenyl)-1-fluorovinyl)diphenylphosphonio)trihydroborate 3e**

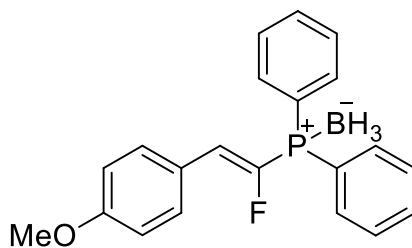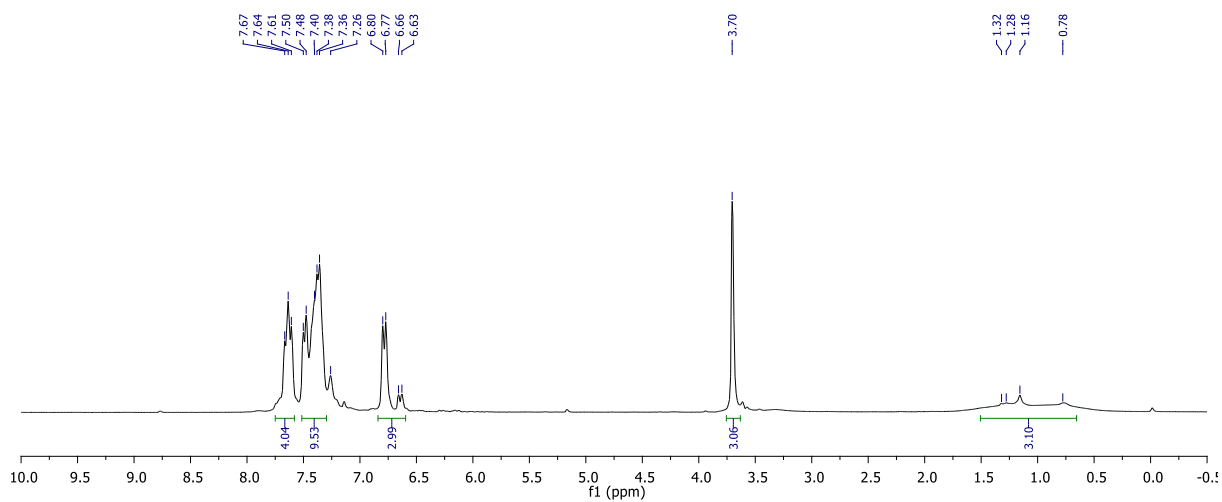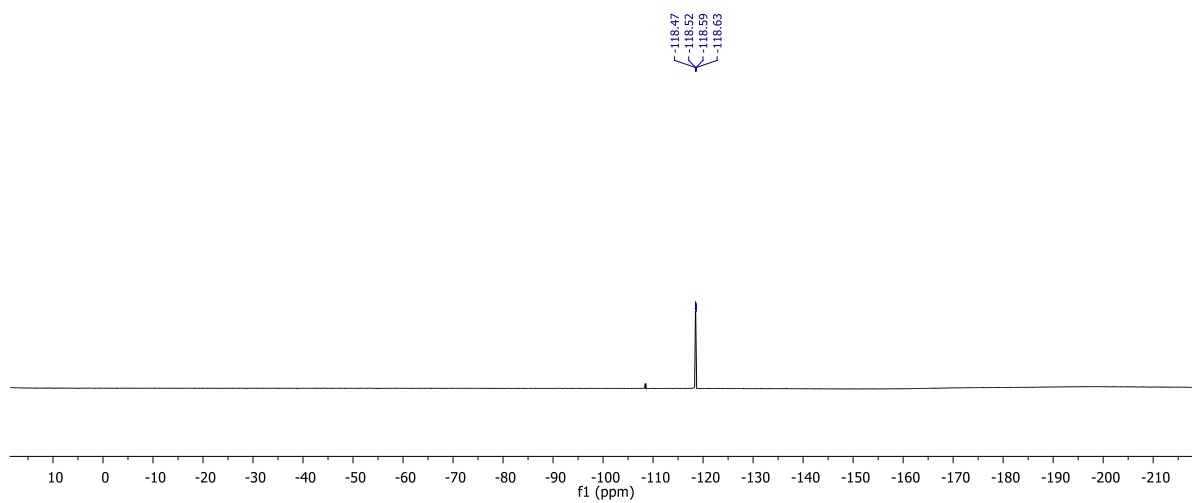

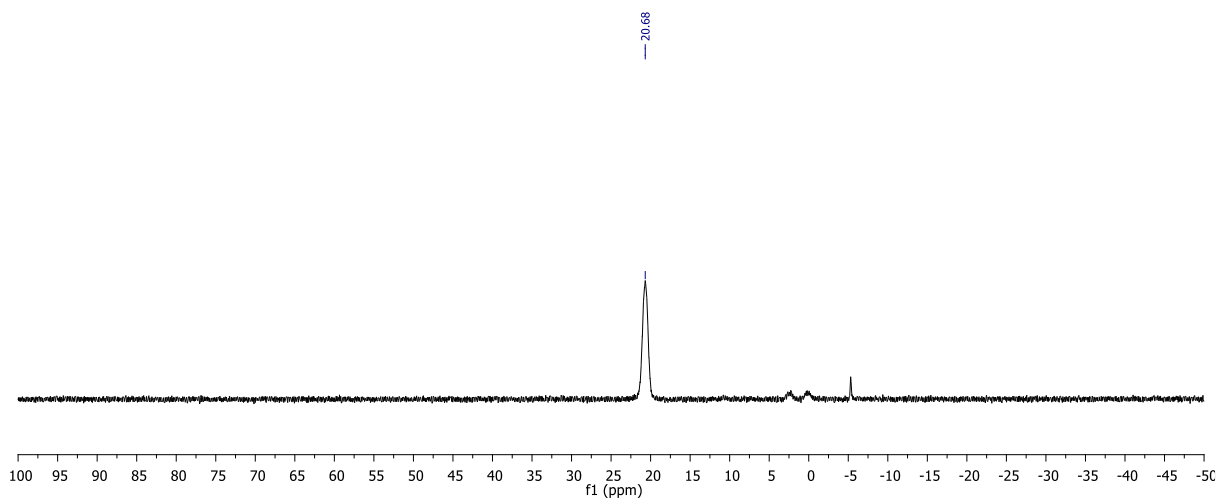

**<sup>31</sup>P NMR in CDCl<sub>3</sub>**

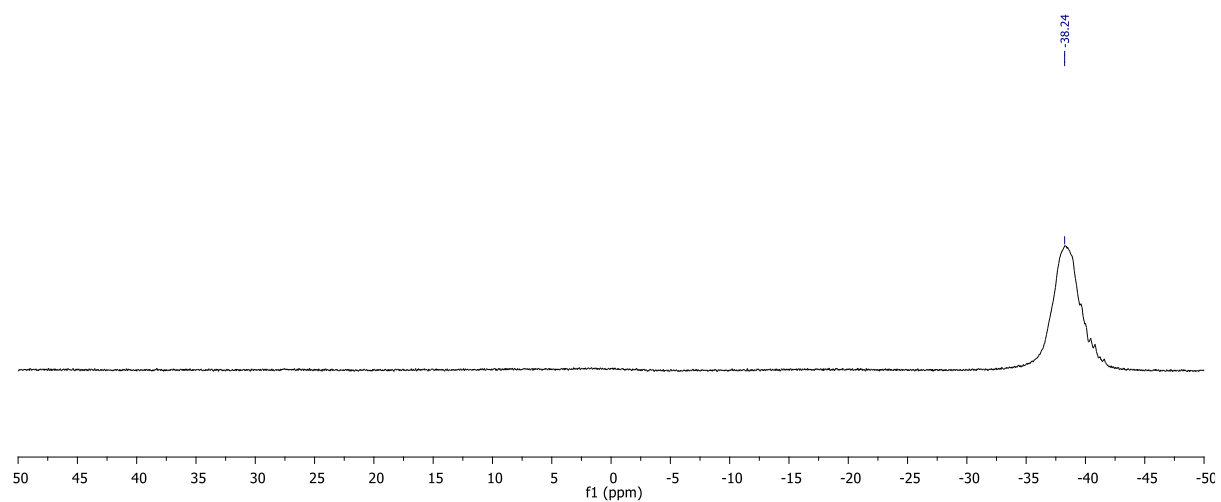

**<sup>11</sup>B NMR in CDCl<sub>3</sub>**

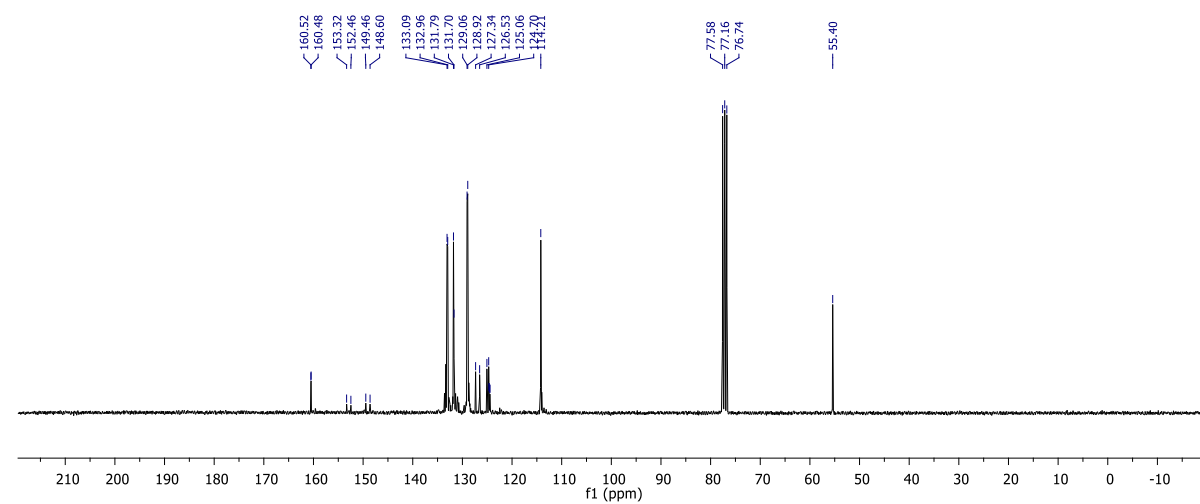

**<sup>13</sup>C NMR {<sup>1</sup>H} in CDCl<sub>3</sub>**

**(E)-((2-(4-Chlorophenyl)-1-fluorovinyl)diphenylphosphonio)trihydroborate 3f**

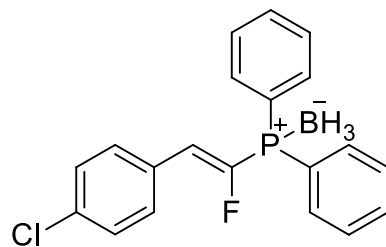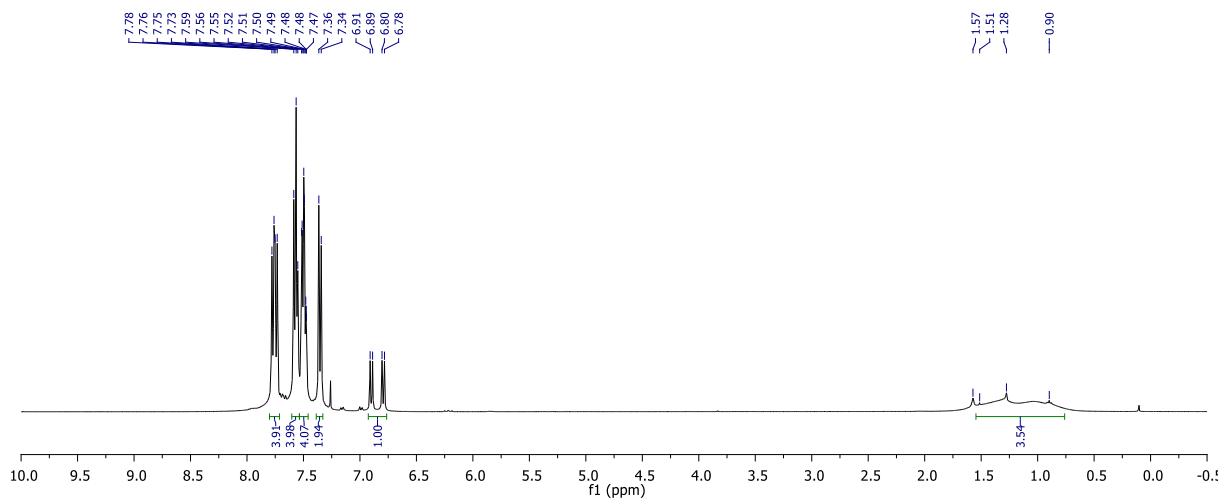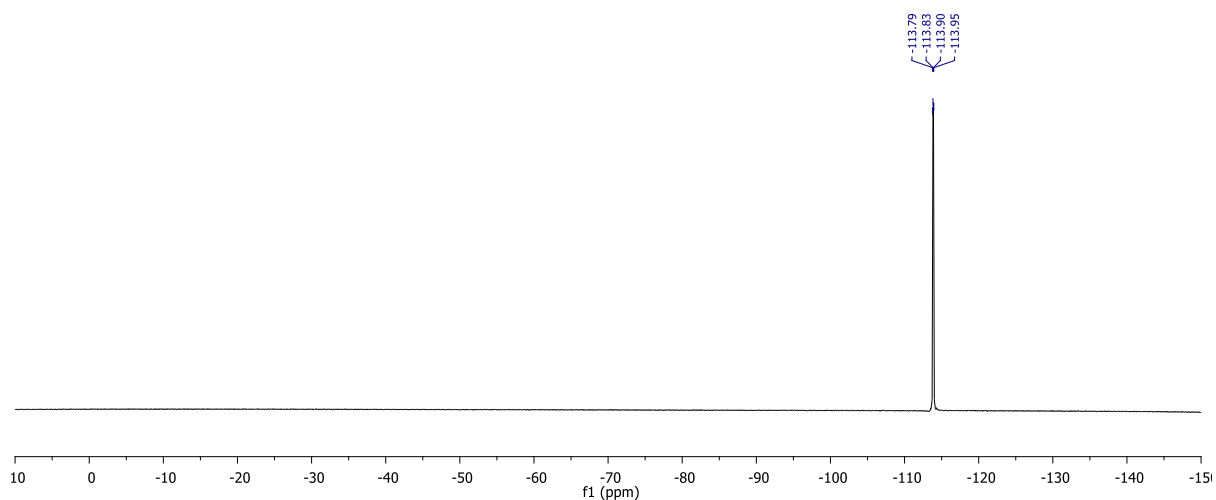



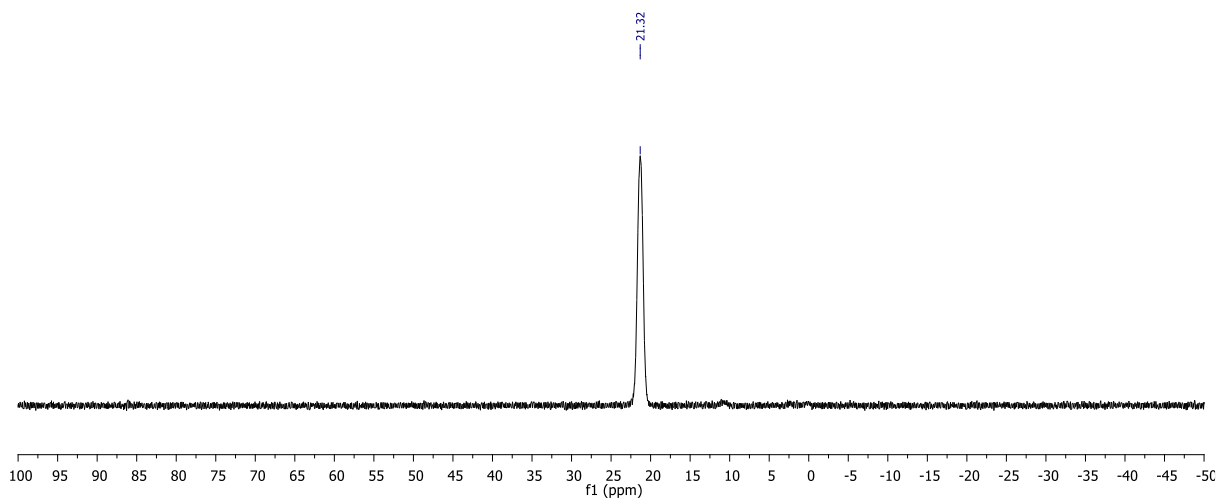

**<sup>31</sup>P NMR in CDCl<sub>3</sub>**

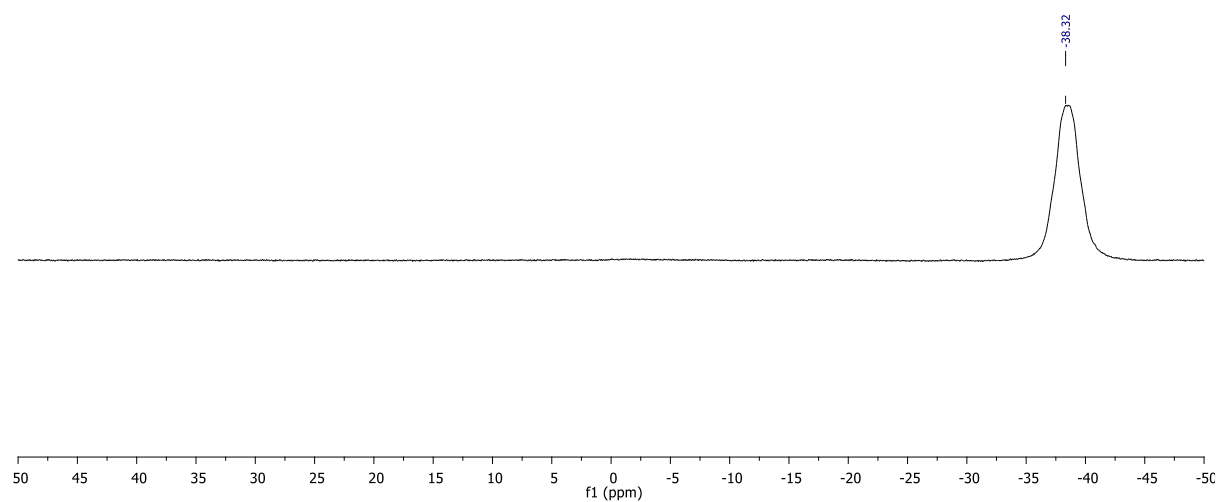

**<sup>11</sup>B NMR in CDCl<sub>3</sub>**

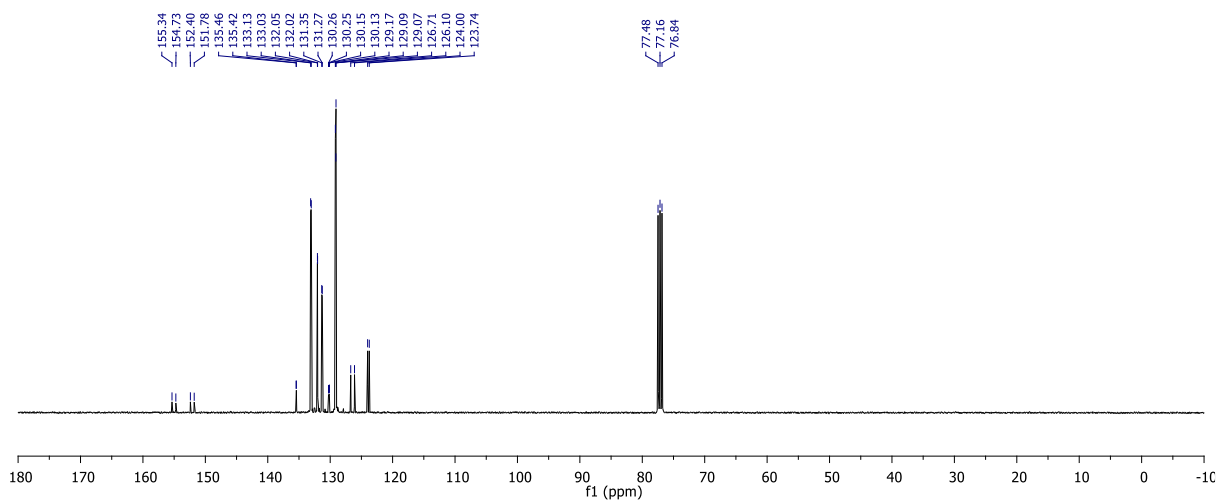

**<sup>13</sup>C NMR {<sup>1</sup>H} in CDCl<sub>3</sub>**

**(E)-((2-(3-Chlorophenyl)-1-fluorovinyl)diphenylphosphonio)trihydroborate 3g**

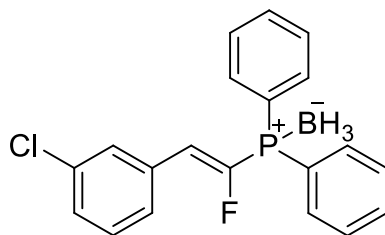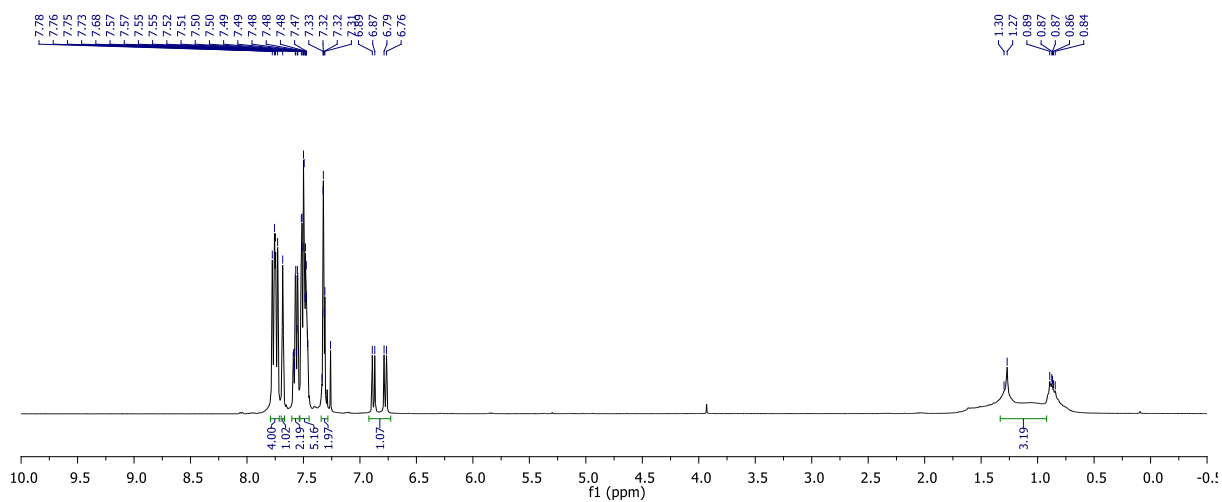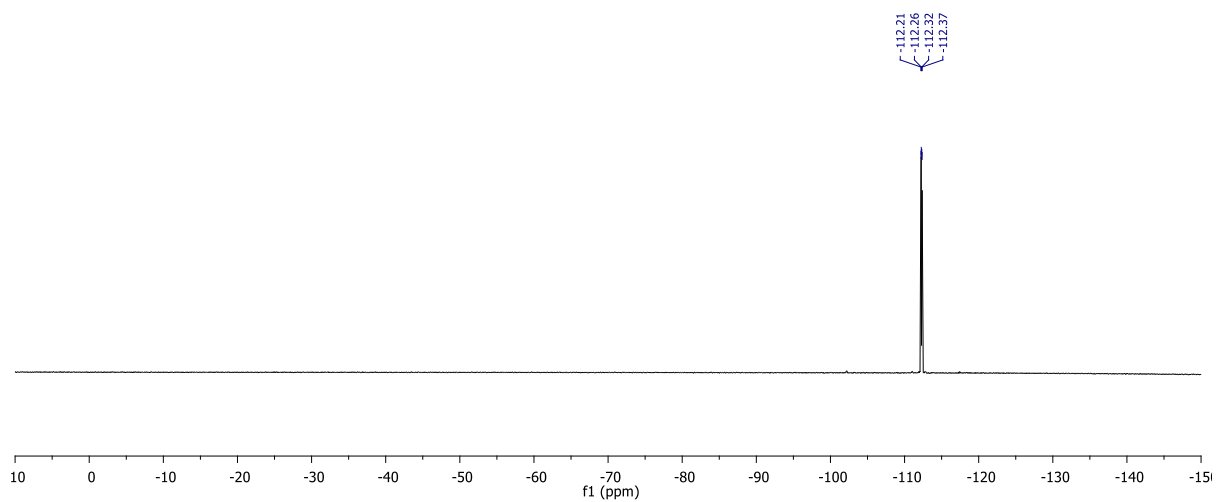

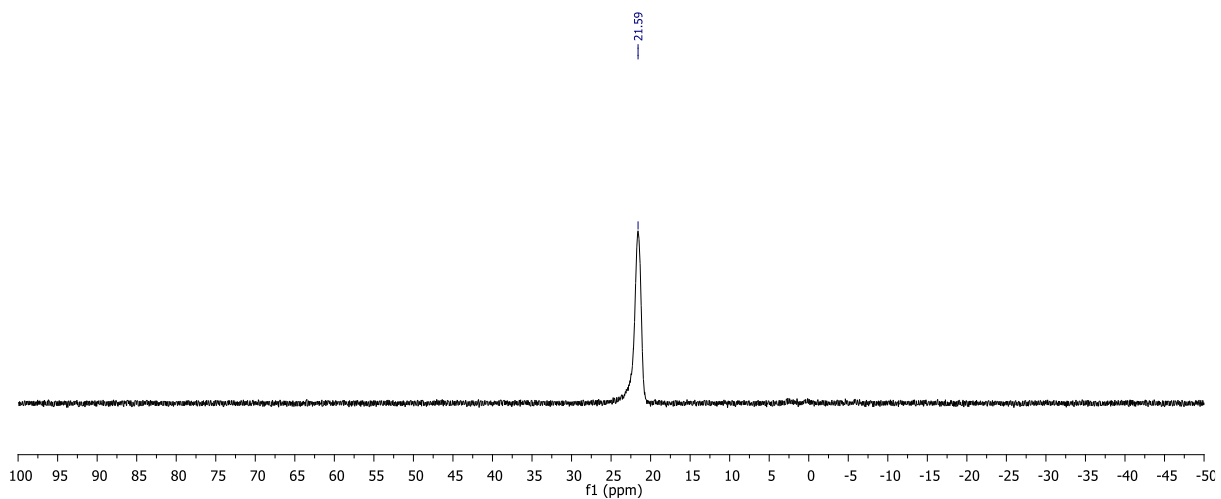

**<sup>31</sup>P NMR in CDCl<sub>3</sub>**

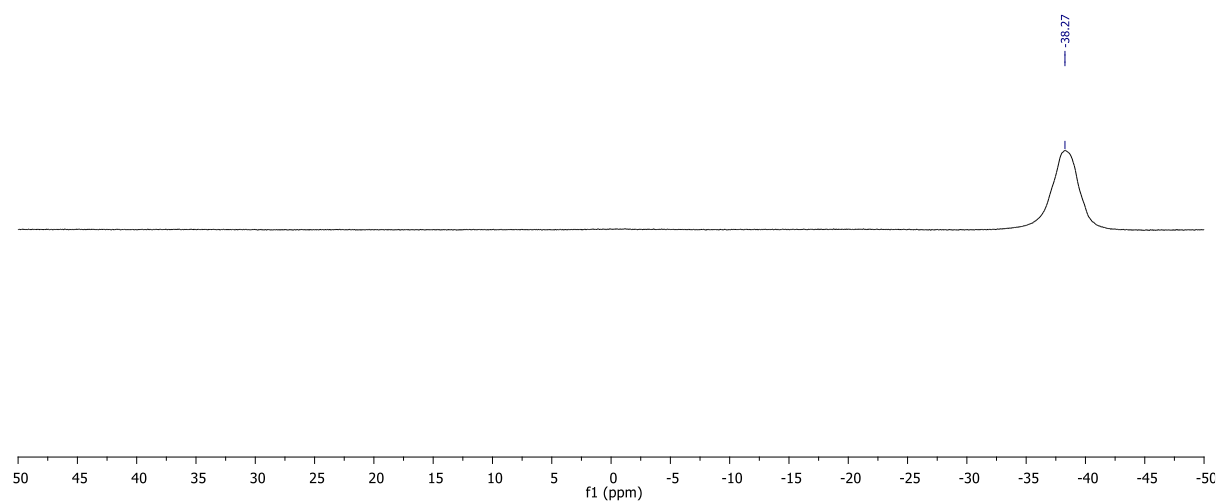

**<sup>11</sup>B NMR in CDCl<sub>3</sub>**

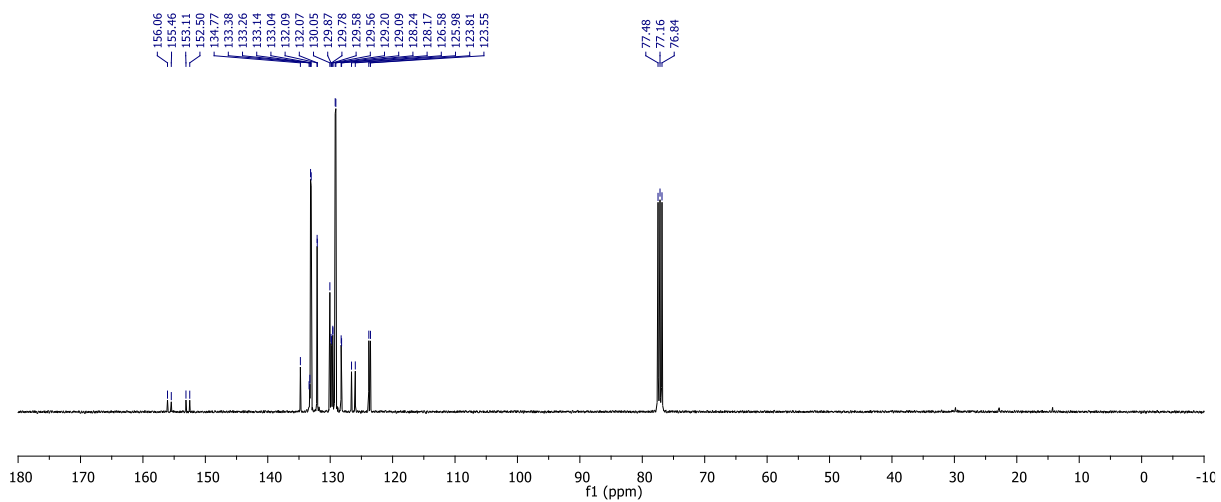

**<sup>13</sup>C NMR {<sup>1</sup>H} in CDCl<sub>3</sub>**



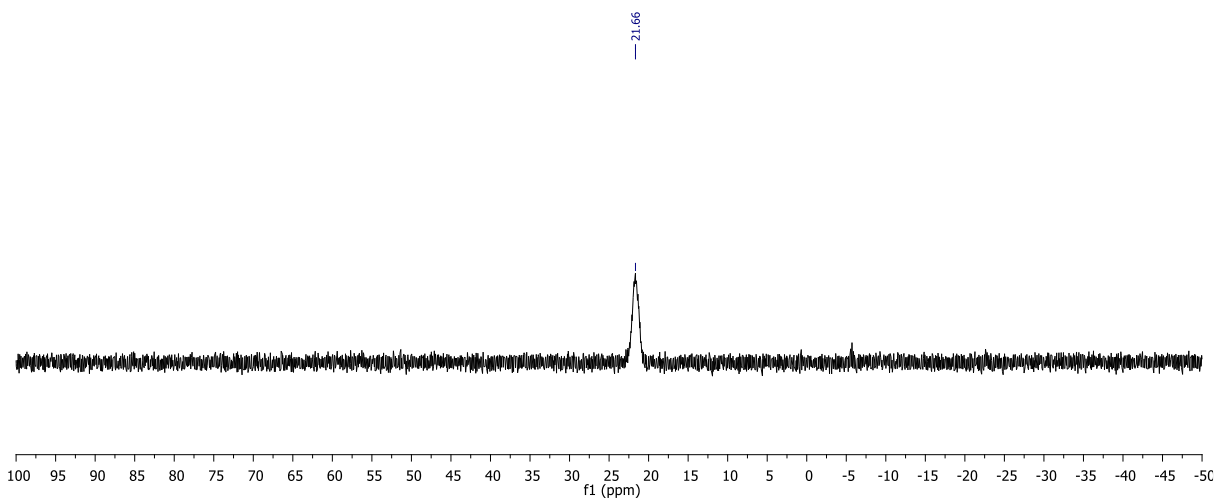

$^{31}\text{P}$  NMR in  $\text{CDCl}_3$

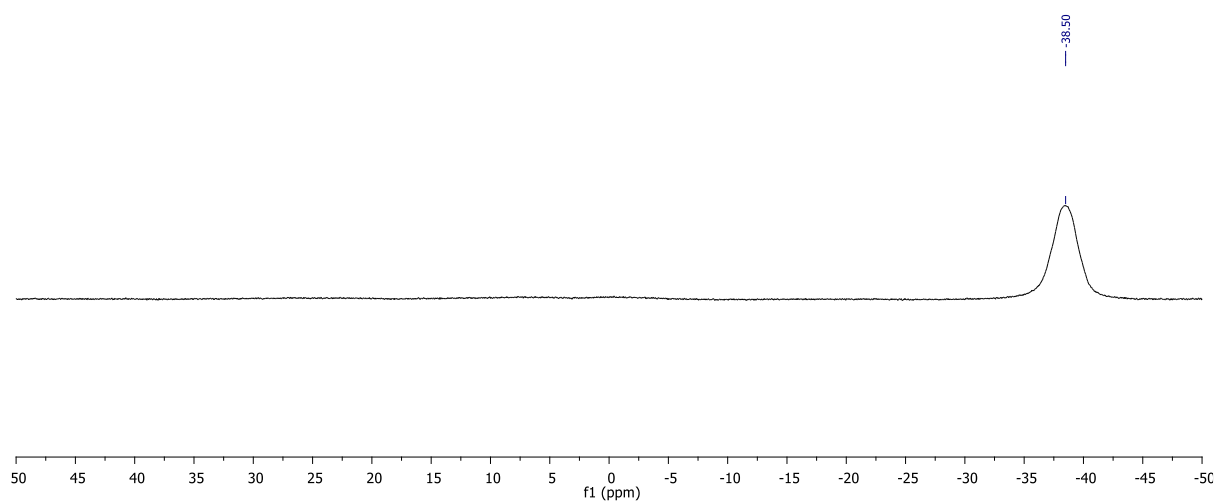

$^{11}\text{B}$  NMR in  $\text{CDCl}_3$

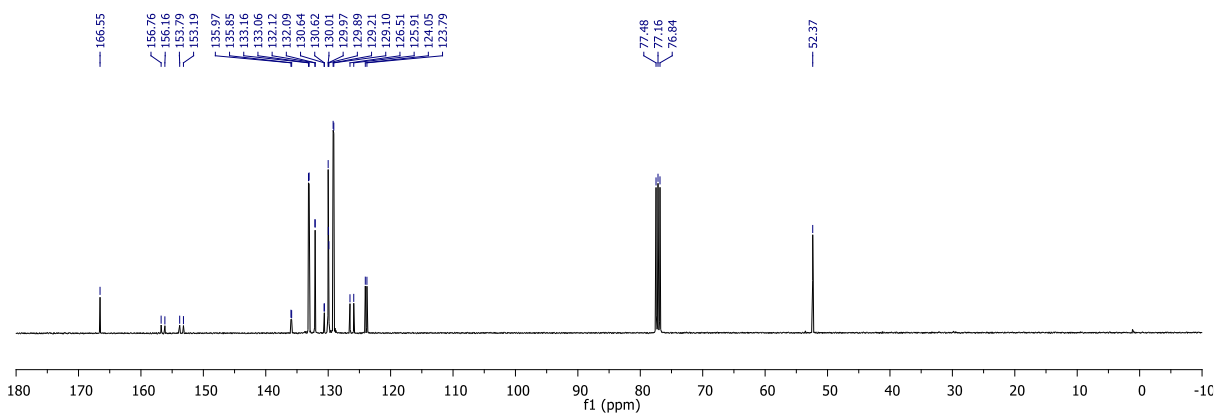

$^{13}\text{C}$  NMR ( $^1\text{H}$ ) in  $\text{CDCl}_3$

**(E)-((2-(4-Nitrophenyl)-1-fluorovinyl)diphenylphosphonio)trihydroborate 3i**

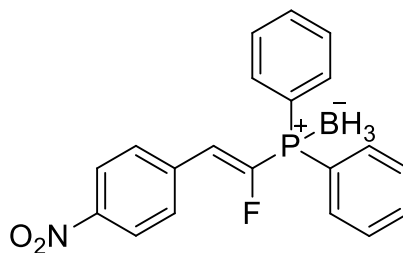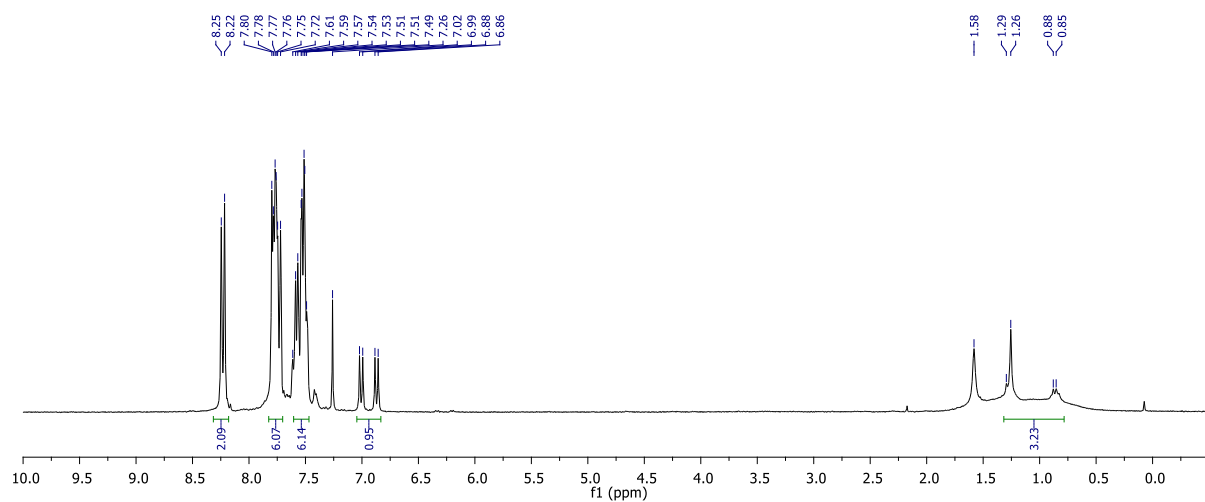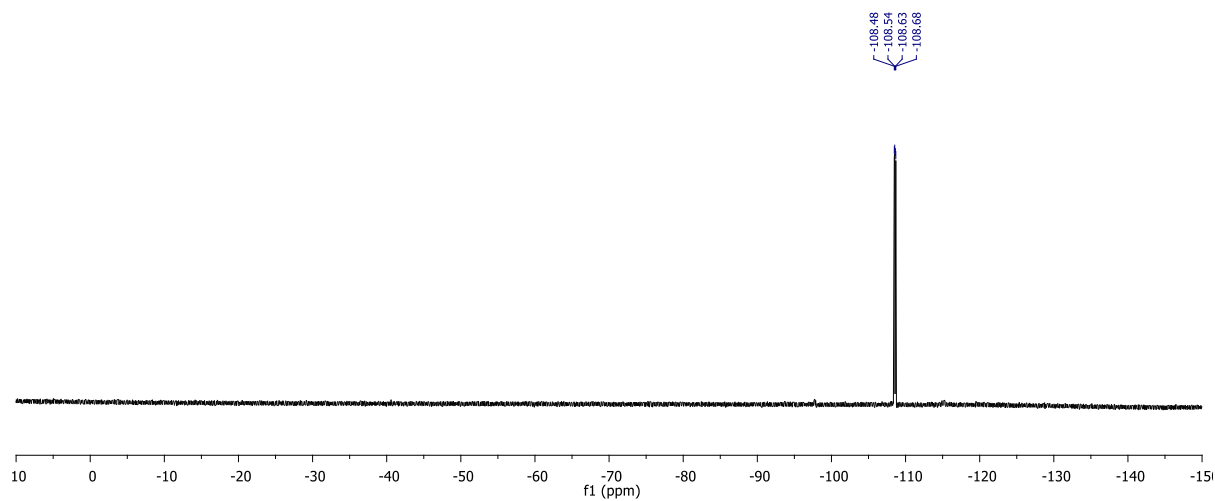

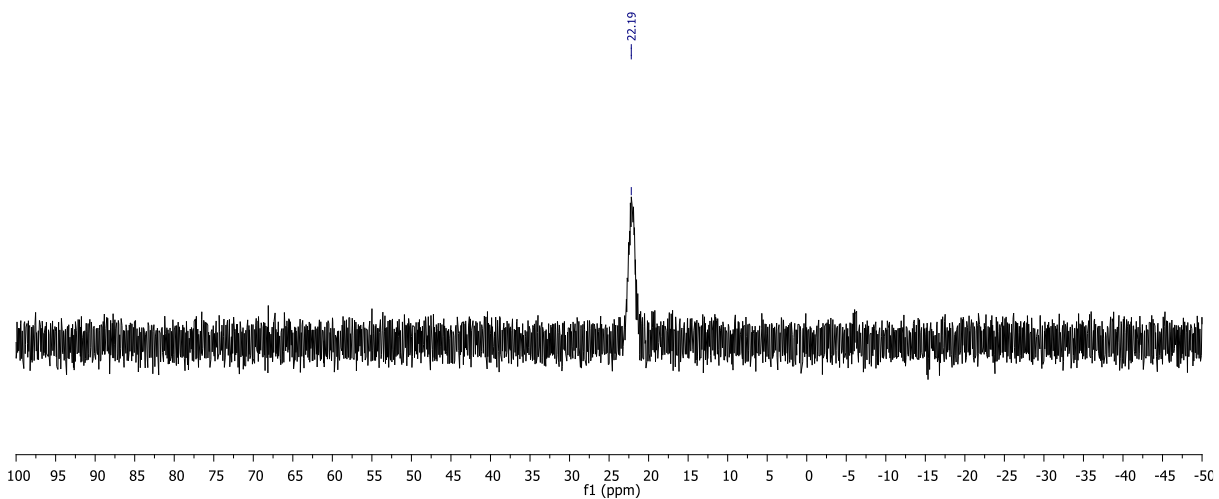

$^{31}\text{P}$  NMR in  $\text{CDCl}_3$

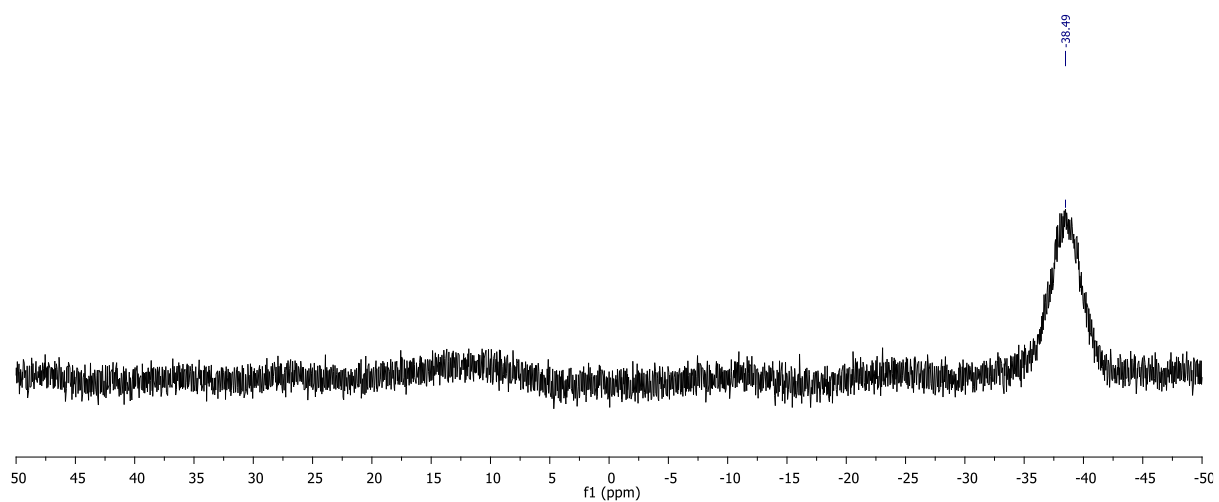

$^{11}\text{B}$  NMR in  $\text{CDCl}_3$

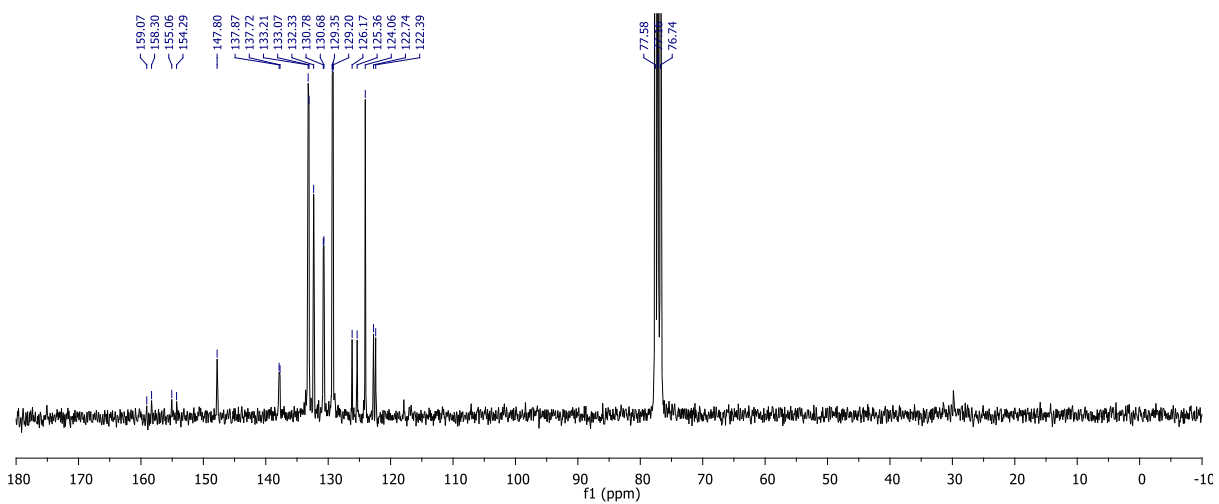

$^{13}\text{C}$  NMR  $\{^1\text{H}\}$  in  $\text{CDCl}_3$

**(E)-((2-(4-Cyanophenyl)-1-fluorovinyl)diphenylphosphonio)trihydroborate 3j**

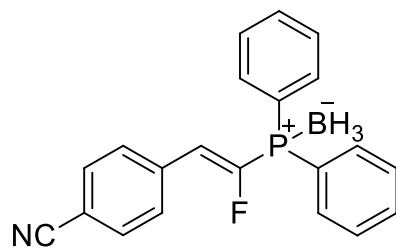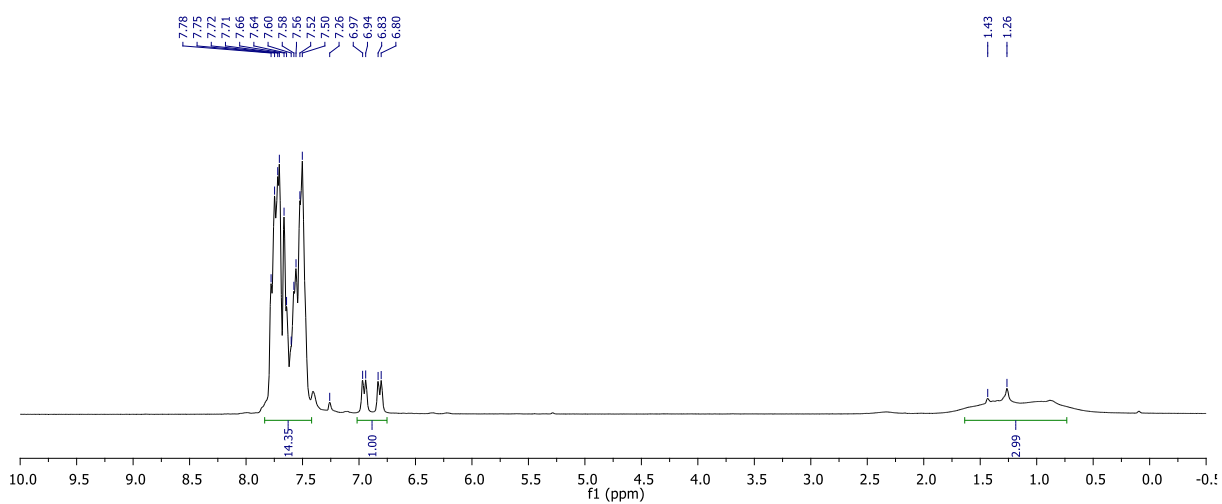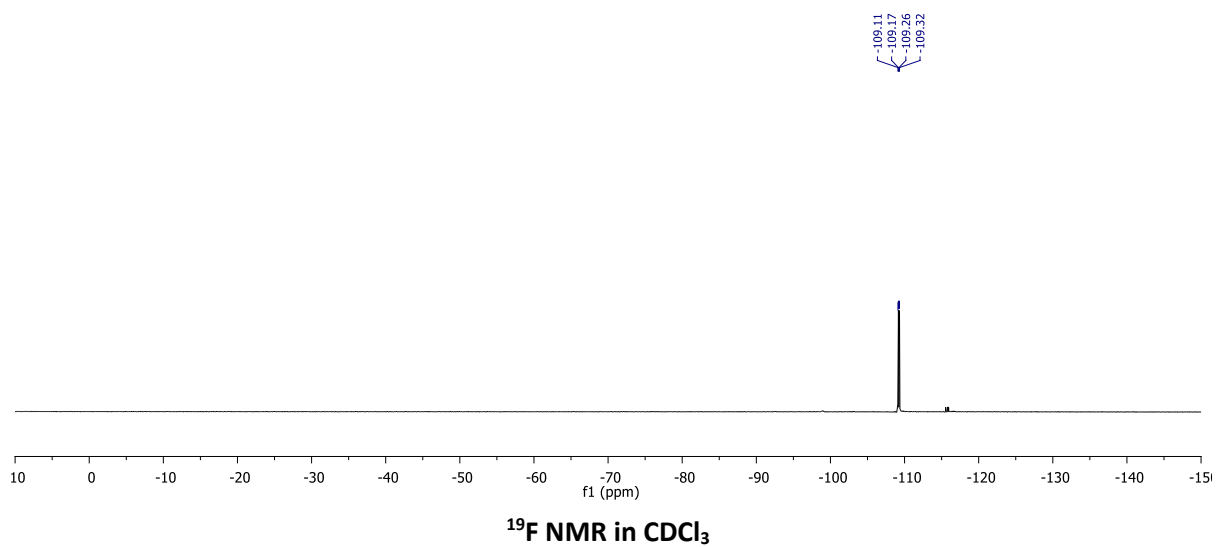



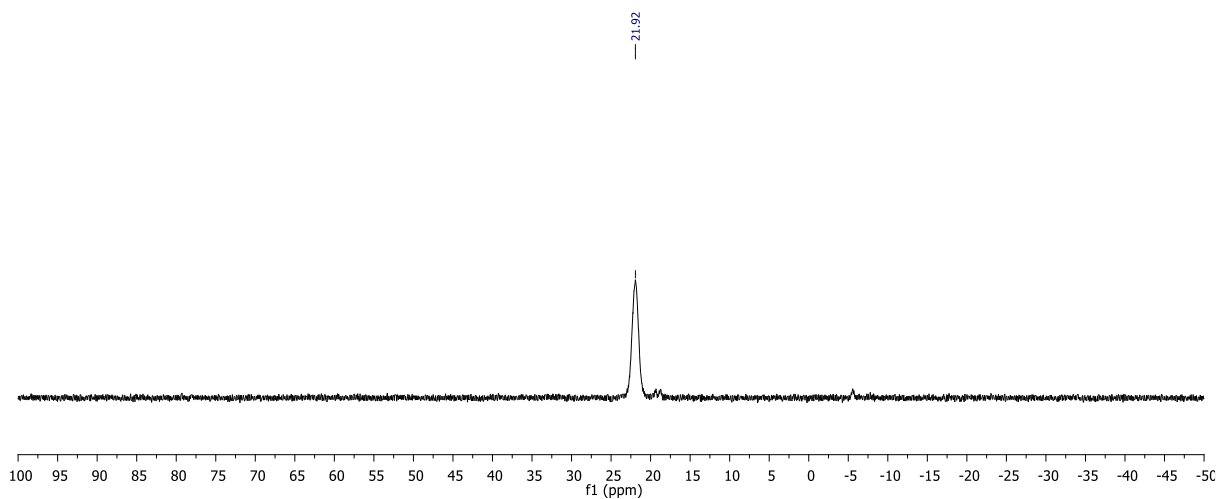

$^{31}\text{P}$  NMR in  $\text{CDCl}_3$

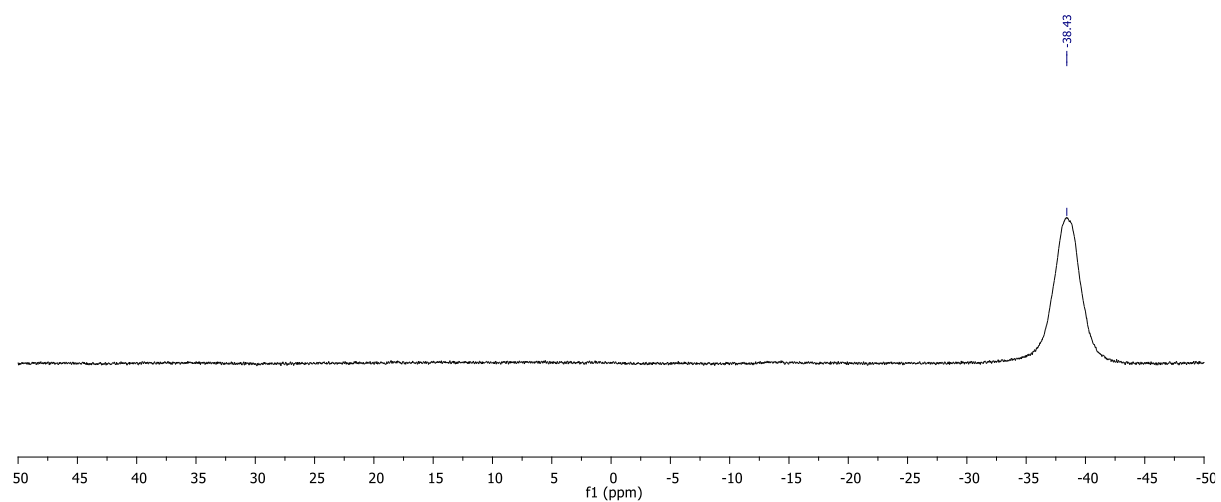

$^{11}\text{B}$  NMR in  $\text{CDCl}_3$

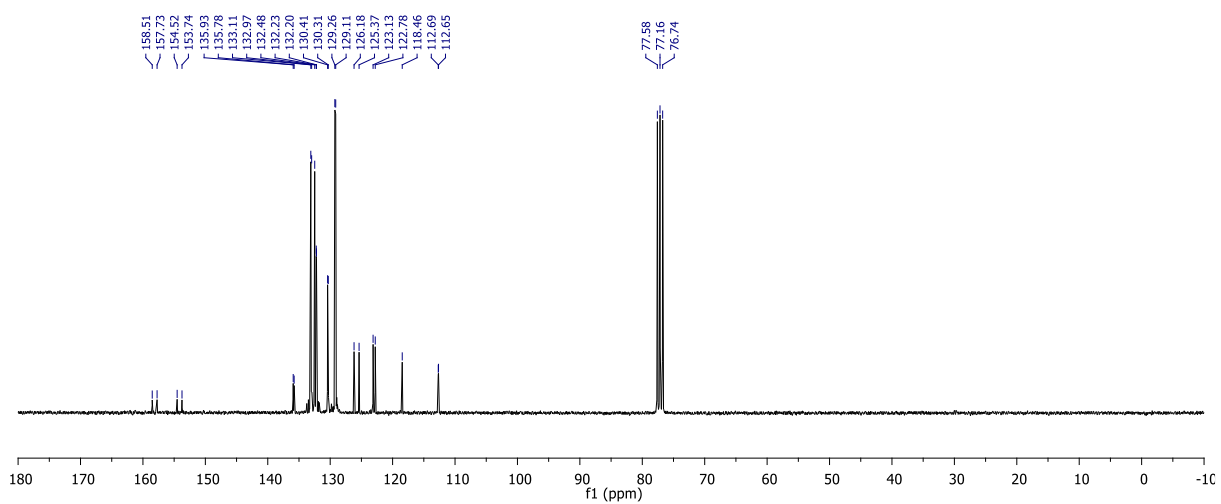

$^{13}\text{C}$  NMR  $\{^1\text{H}\}$  in  $\text{CDCl}_3$

**(E)-((1-Fluoro-2-(naphth-2-yl)vinyl)-bis(4-methoxyphenyl)phosphonio)trihydroborate**

**3k**

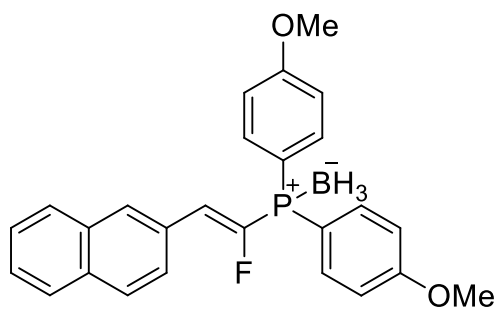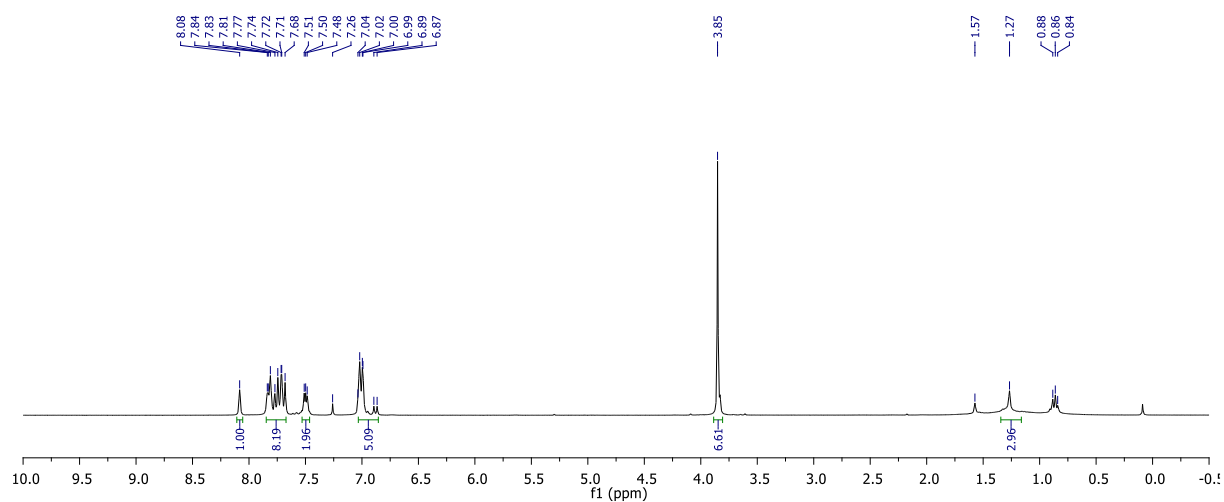

<sup>1</sup>H NMR in CDCl<sub>3</sub>

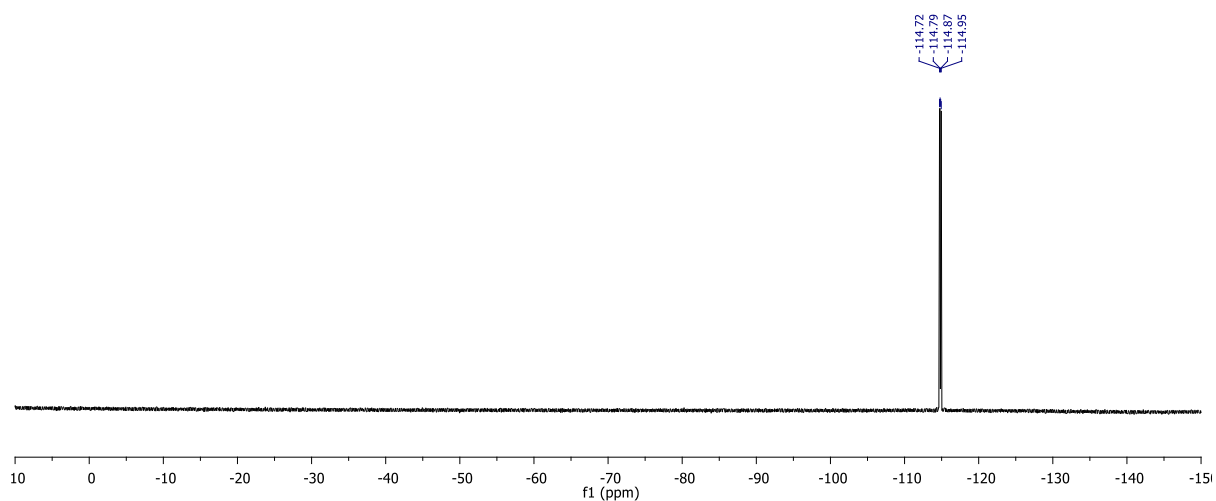

<sup>19</sup>F NMR in CDCl<sub>3</sub>

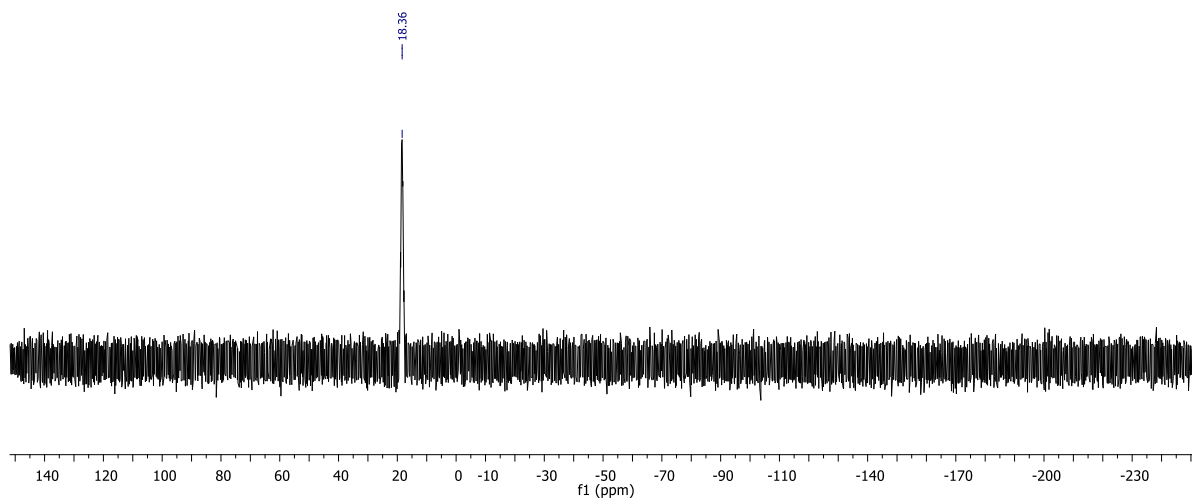

$^{31}\text{P}$  NMR in  $\text{CDCl}_3$

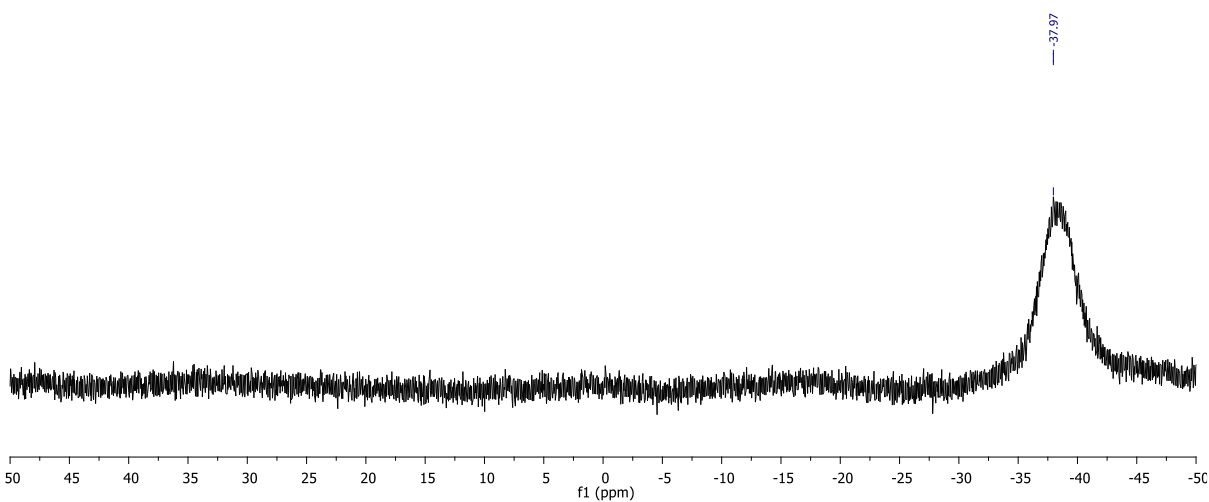

$^{11}\text{B}$  NMR in  $\text{CDCl}_3$

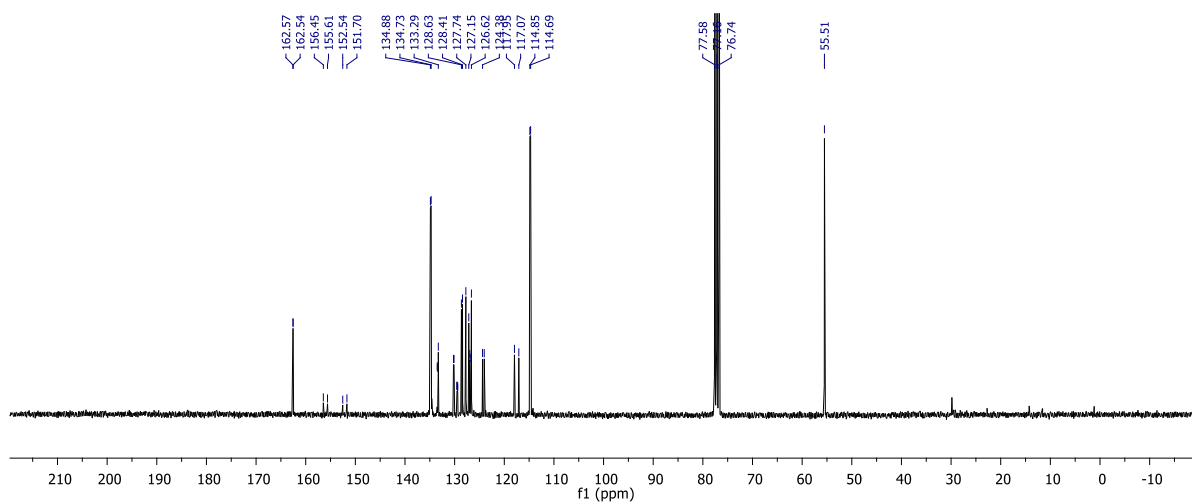

$^{13}\text{C}$  NMR ( $^1\text{H}$ ) in  $\text{CDCl}_3$

**(E)-((2-(3-Chlorophenyl)-1-fluorovinyl)-bis(4-methoxyphenyl)phosphonio)trihydroborate 3l**

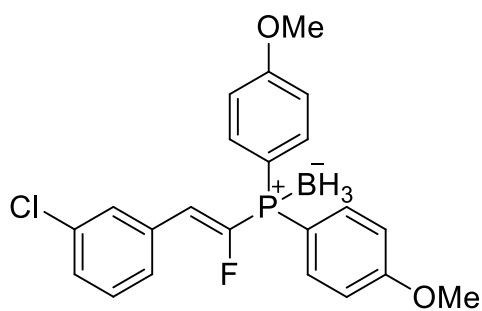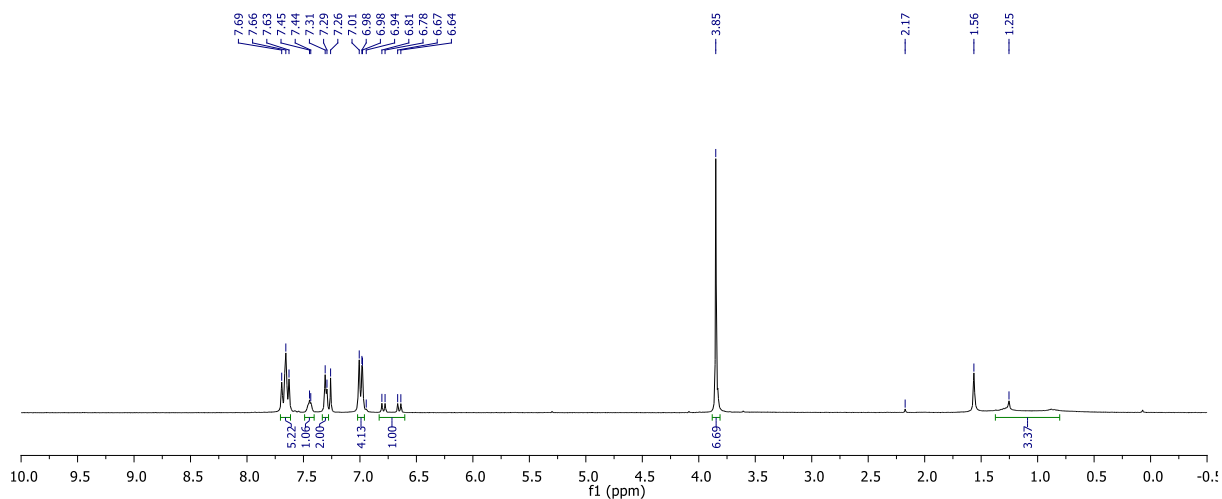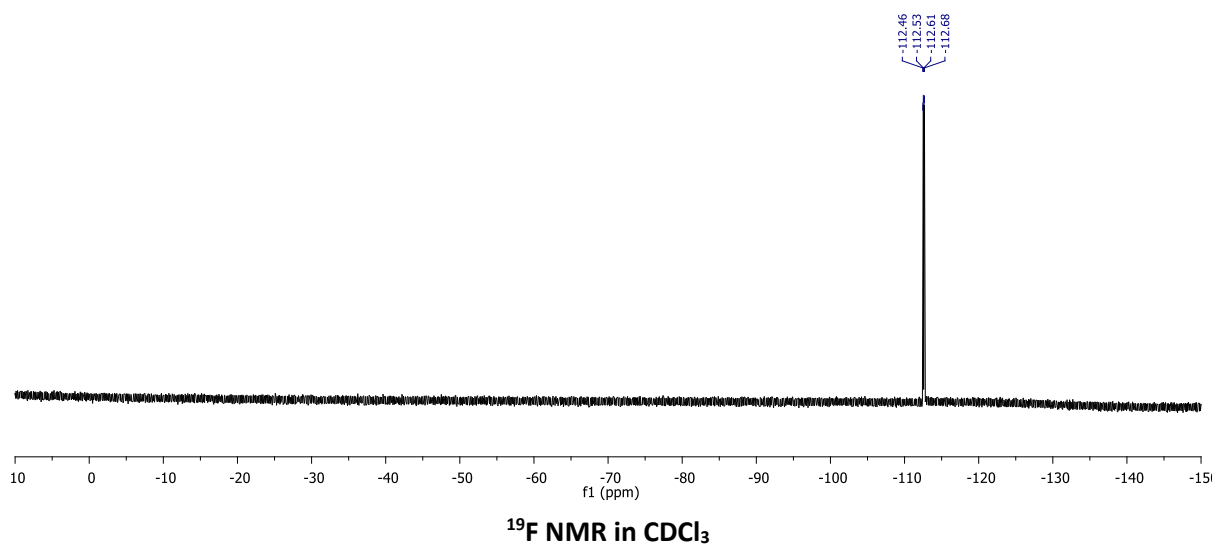

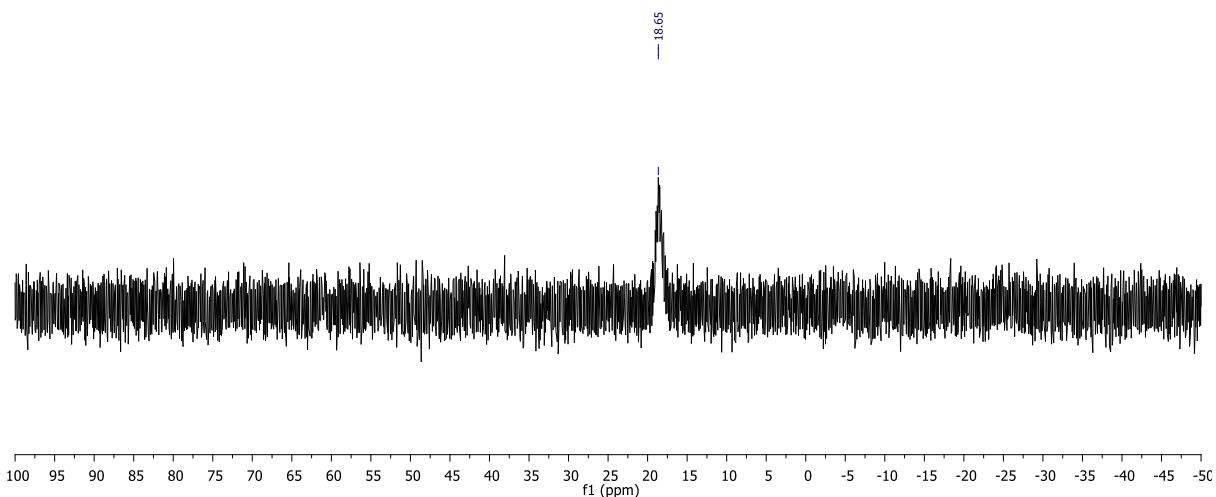

$^{31}\text{P}$  NMR in  $\text{CDCl}_3$

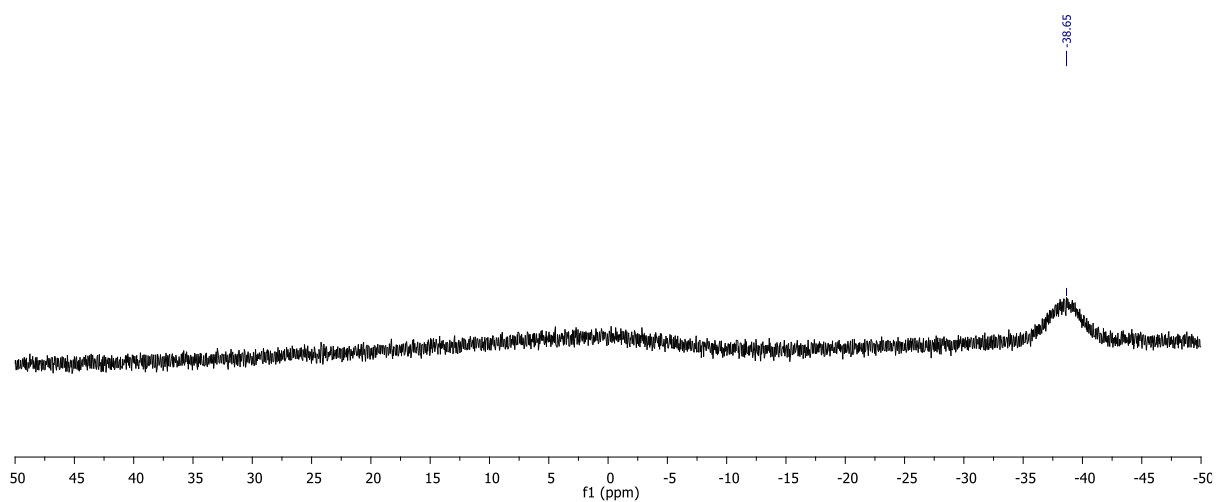

$^{11}\text{B}$  NMR in  $\text{CDCl}_3$

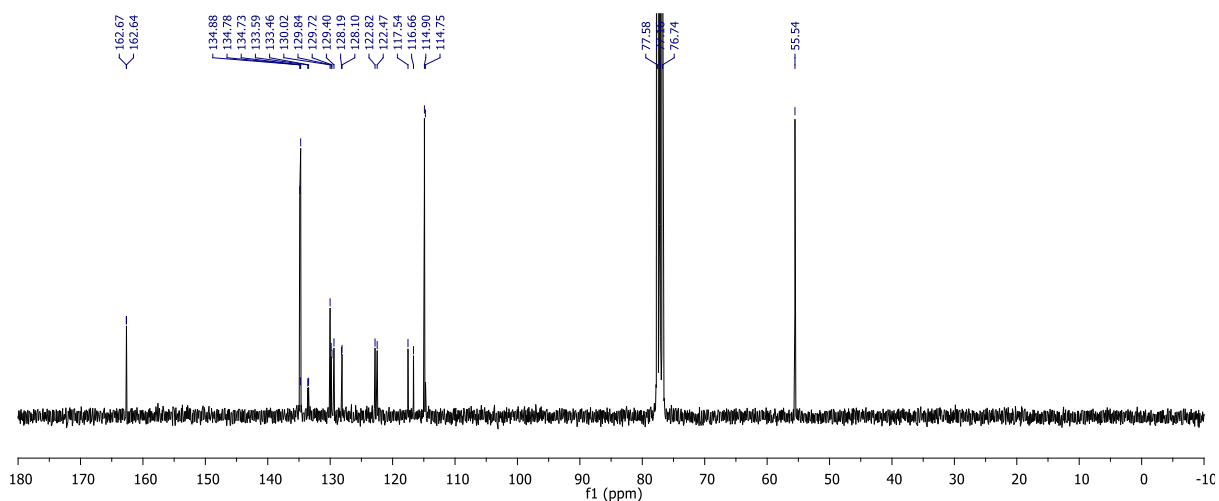

$^{13}\text{C}$  NMR  $\{^1\text{H}\}$  in  $\text{CDCl}_3$

**(E)-((2-(4-Cyanophenyl)-1-fluorovinyl) bis(4-methoxyphenyl)phosphonio)trihydroborate**  
**3m**

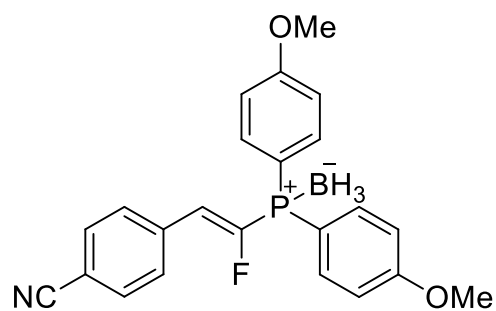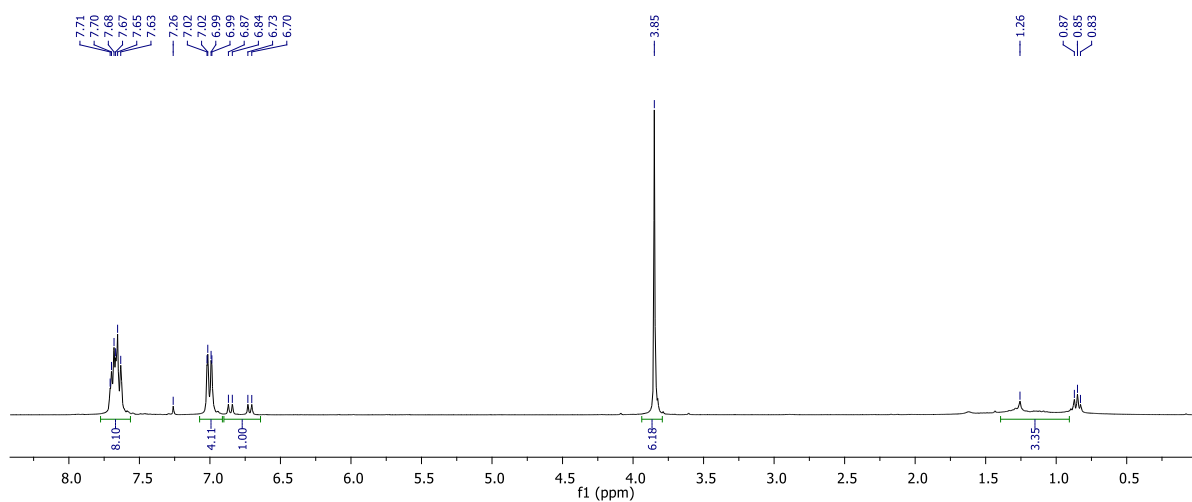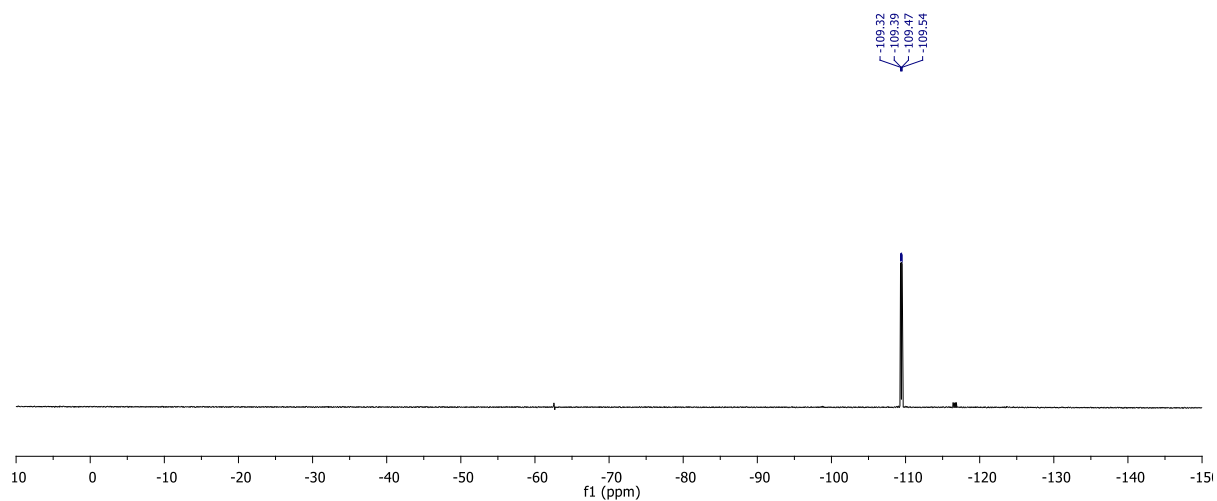

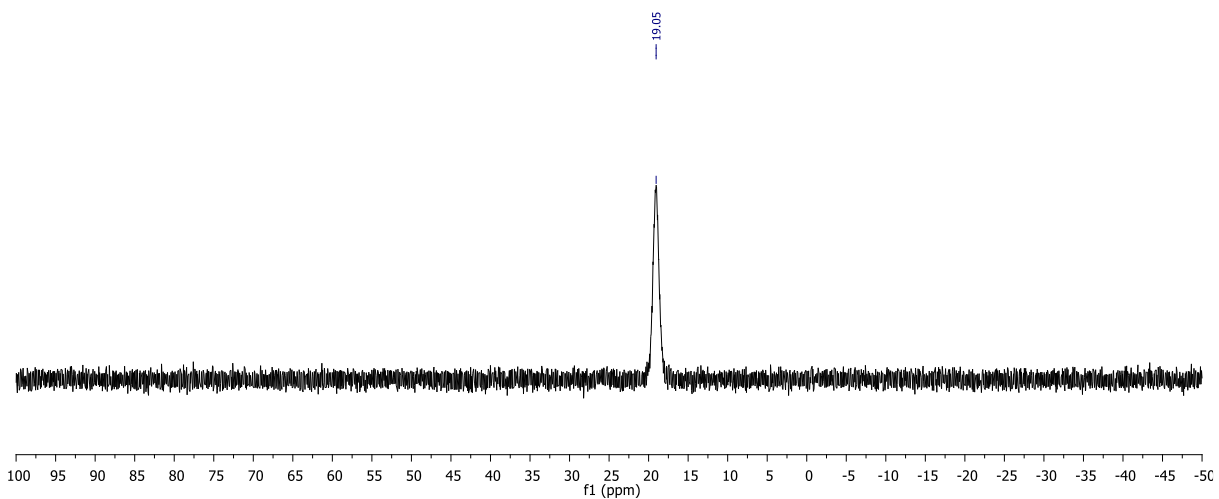

$^{31}\text{P}$  NMR in  $\text{CDCl}_3$

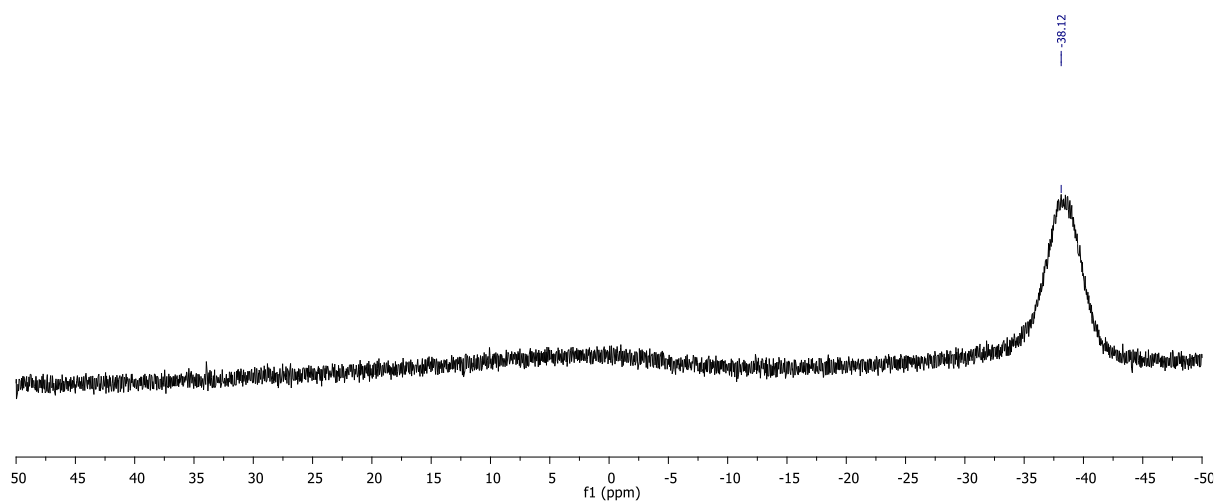

$^{11}\text{B}$  NMR in  $\text{CDCl}_3$

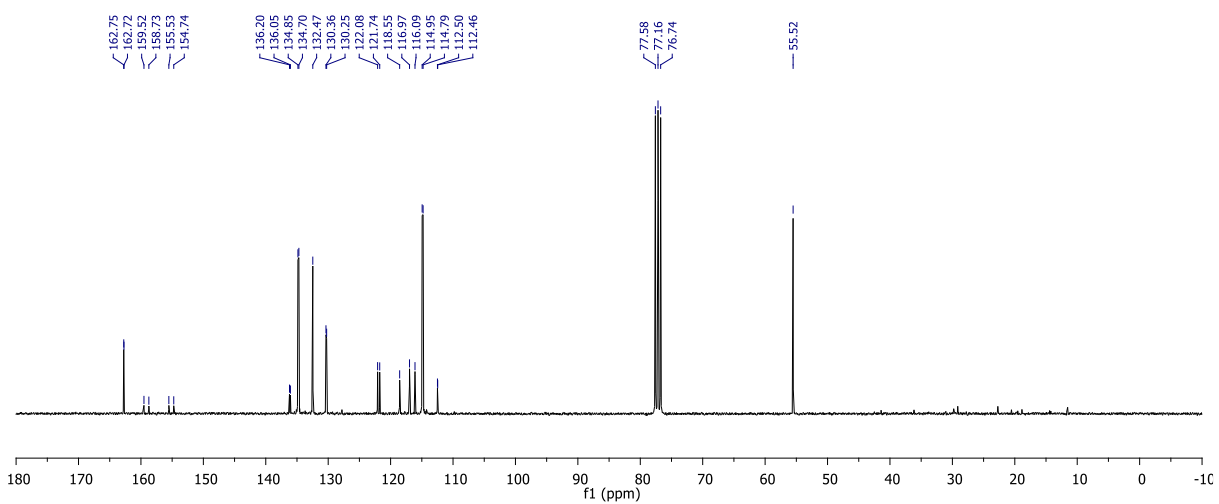

$^{13}\text{C}$  NMR  $\{^1\text{H}\}$  in  $\text{CDCl}_3$

**(E)-(1-Fluoro-2-(naphth-2-yl)vinyl)diphenylphosphine 3a'**

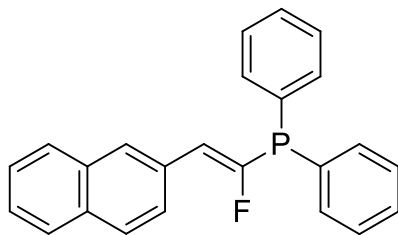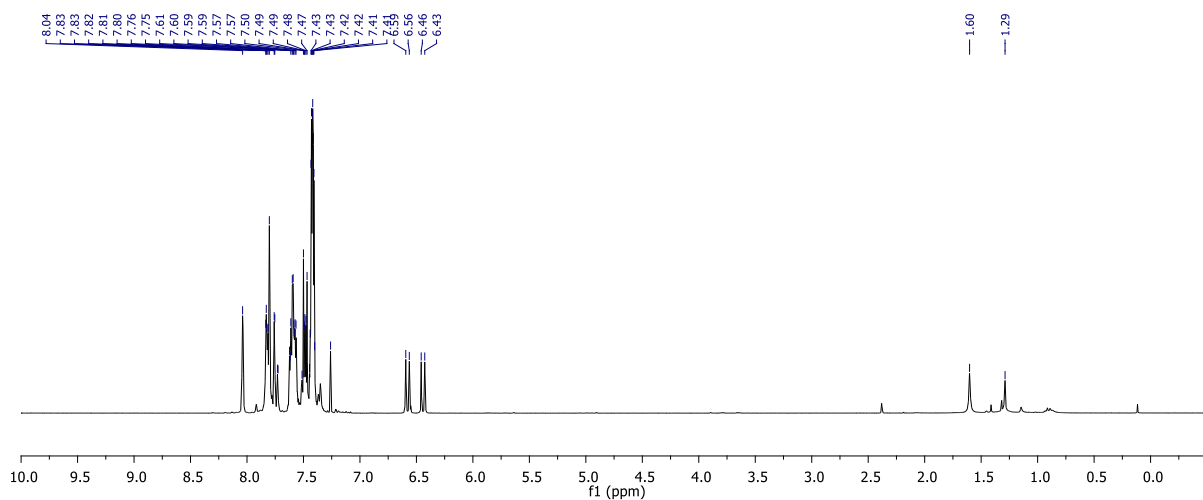

$^1\text{H}$  NMR in  $\text{CDCl}_3$

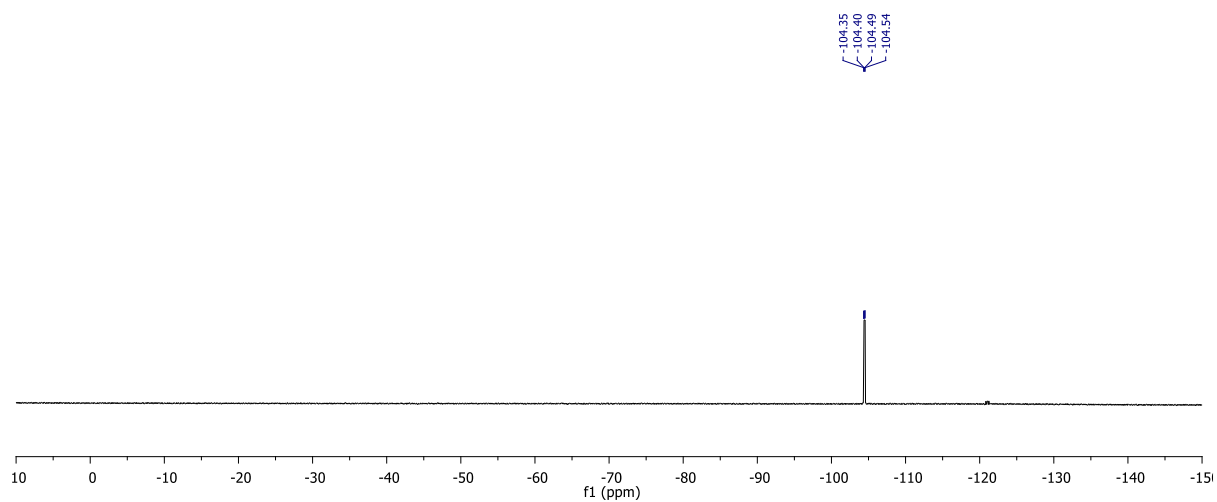

$^{19}\text{F}$  NMR in  $\text{CDCl}_3$



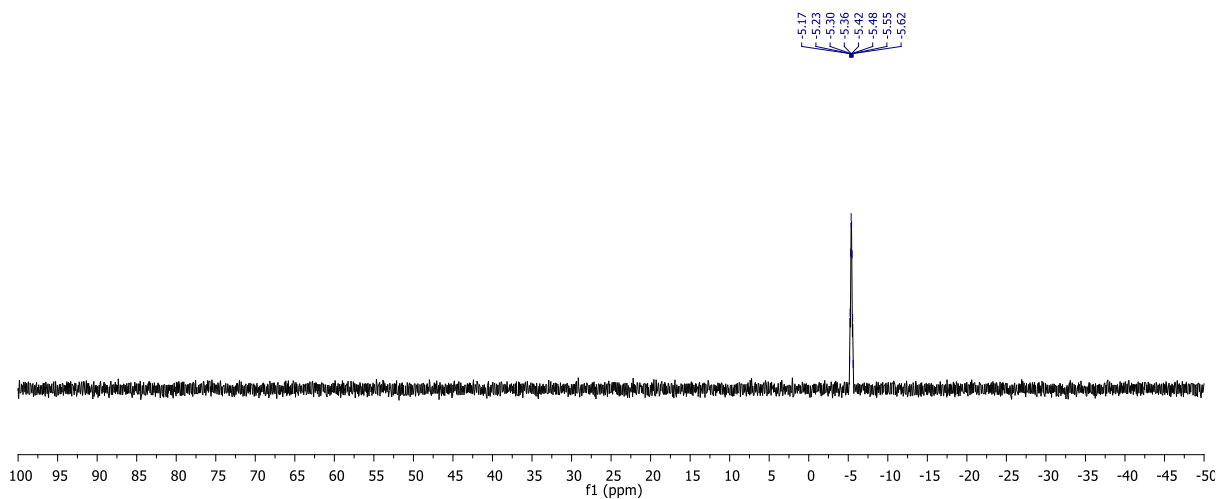

$^{31}\text{P}$  NMR in  $\text{CDCl}_3$

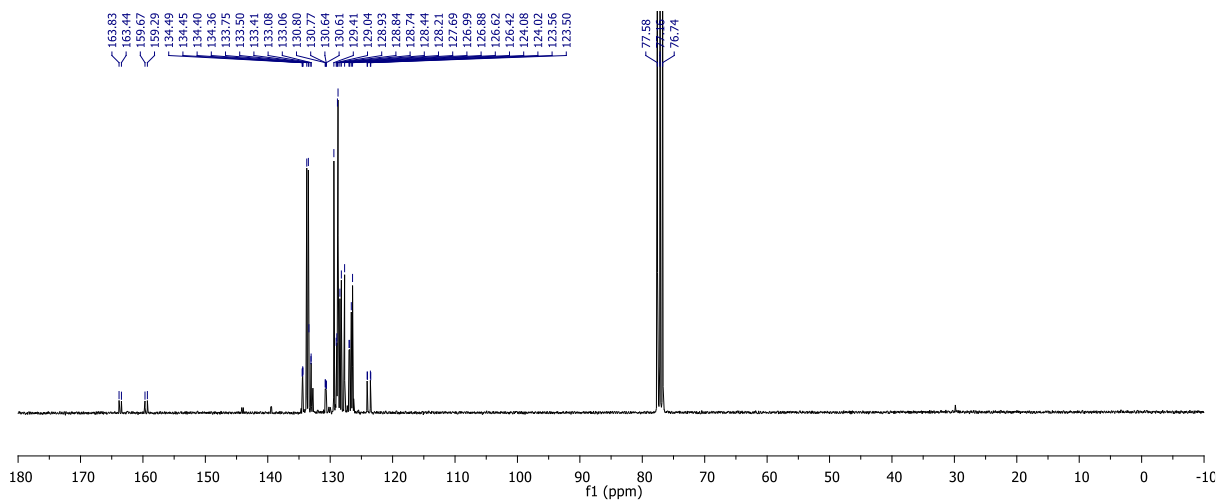

$^{13}\text{C}$  NMR ( $\{^1\text{H}\}$ ) in  $\text{CDCl}_3$

## 6. Electron paramagnetic resonance (EPR) experiment

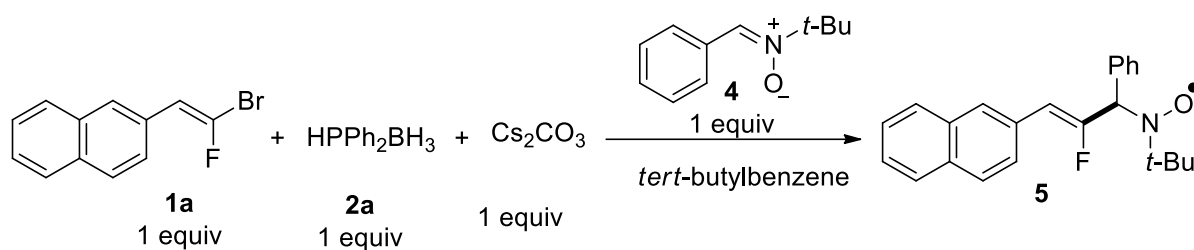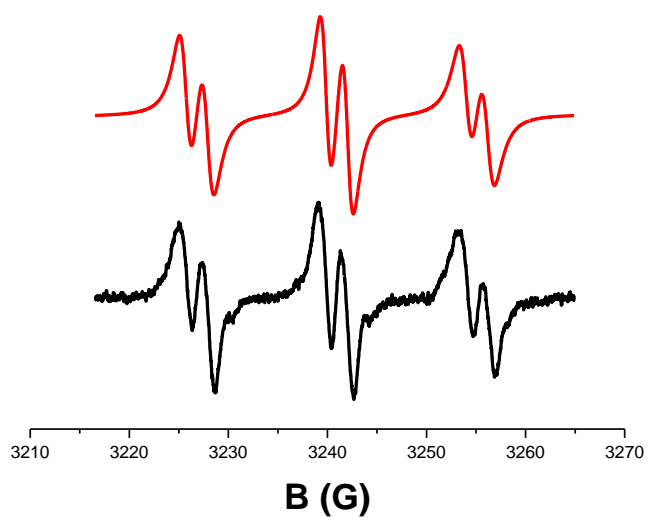

$$a_N = 14.5; a_H = 2.3 \text{ G}$$

## 7. X-Ray structures

### *(E)*-((1-Fluoro-2-(naphth-2-yl)vinyl)diphenylphosphonio)trihydroborate **3a**

Hydrogen atoms are omitted for clarity.

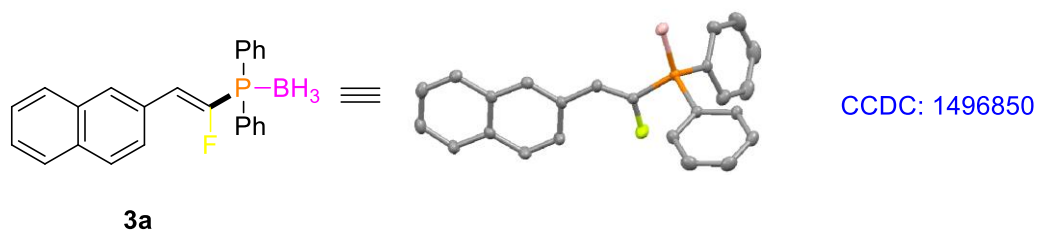

**Figure 1 :** X-Ray Structure of **3a**

### *(E)*-((2-(4-Chlorophenyl)-1-fluorovinyl)diphenylphosphonio)trihydroborate **3f**

Hydrogen atoms are omitted for clarity.

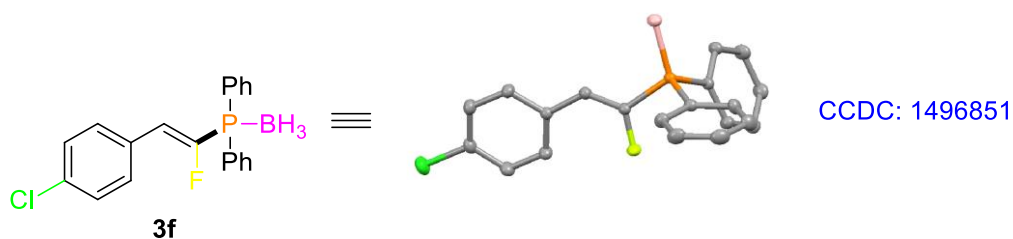

**Figure 2 :** X-Ray Structure of **3f**

### *(E)*-((2-(3-Chlorophenyl)-1-fluorovinyl)diphenylphosphonio)trihydroborate **3g**

Hydrogen atoms are omitted for clarity.

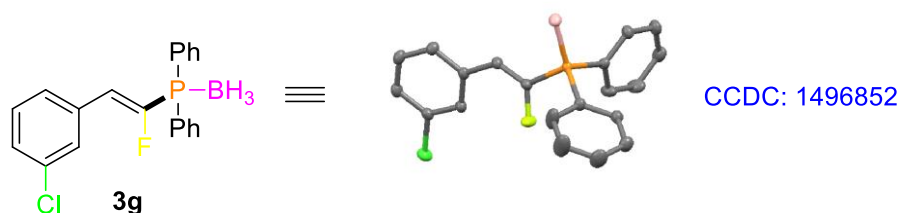

**Figure 3 :** X-Ray Structure of **3g**
